# Supplementary material for: Genomic and single-cell analyses reveal genetic signatures of swimming pattern and diapause strategy in jellyfish
Source: PubMed Central journal article supplement (PMC11250803; doi:10.1038/s41467-024-49848-z), 2024-07-15
Supplement: 41467_2024_49848_MOESM1_ESM.pdf [file 41467_2024_49848_MOESM1_ESM.pdf]

1 **Supplementary Information to:**  
2 **Genomic and single-cell analyses reveal genetic signatures of swimming**  
3 **pattern and diapause strategy in jellyfish**  
4

5 **Authors:** Zhijun Dong<sup>1,2†\*</sup>, Fanghan Wang<sup>1,2†</sup>, Yali Liu<sup>2,3,4†</sup>, Yongxue Li<sup>1,2†</sup>, Haiyan  
6 Yu<sup>5</sup>, Saijun Peng<sup>1,2</sup>, Tingting Sun<sup>1,2</sup>, Meng Qu<sup>2,3,4</sup>, Ke Sun<sup>6</sup>, Lei Wang<sup>1,2</sup>, Yuanqing  
7 Ma<sup>7</sup>, Kai Chen<sup>6</sup>, Jianmin Zhao<sup>1,2\*</sup>, Qiang Lin<sup>2,3,4\*</sup>

8 †Authors contributed equally to this work.

9 \*Correspondence to: linqiang@scsio.ac.cn (Q.L.); zjdong@yic.ac.cn (Z.J.D.);  
10 jmzhao@yic.ac.cn (J.M.Z)

11  
12 **Affiliations:**

13 <sup>1</sup>CAS Key Laboratory of Coastal Environmental Processes and Ecological  
14 Remediation, Yantai Institute of Coastal Zone Research, Chinese Academy of  
15 Sciences, Yantai, Shandong 264003, China.

16 <sup>2</sup>University of Chinese Academy of Sciences, Beijing 100101, China.

17 <sup>3</sup>CAS Key Laboratory of Tropical Marine Bio-Resources and Ecology, South  
18 China Sea Institute of Oceanology, Chinese Academy of Sciences, Guangzhou  
19 510301, China.

20 <sup>4</sup>Guangdong Provincial Key Laboratory of Applied Marine Biology, South China  
21 Sea Institute of Oceanology, Chinese Academy of Sciences, Guangzhou 510301,  
22 China.

23 <sup>5</sup>College of the Environment and Ecology, Xiamen University, Xiamen 361102,  
24 China.

25 <sup>6</sup>State Key Laboratory of Primate Biomedical Research, Institute of Primate  
26 Translational Medicine, Kunming University of Science and Technology,  
27 Kunming, Yunnan 650500, China.

28 <sup>7</sup>Shandong Key Laboratory of Marine Ecological Restoration, Shandong Marine  
29 Resource and Environment Research Institute, Yantai, Shandong 264006, China.

|    |                                   |                   |
|----|-----------------------------------|-------------------|
| 30 | <b>Supplementary Information</b>  |                   |
| 31 |                                   |                   |
| 32 | <b>Table of Contents</b>          |                   |
| 33 | <b>Supplementary Notes 1-11</b>   | <b>Page 3-9</b>   |
| 34 | <b>Supplementary Figures 1-19</b> | <b>Page 10-30</b> |
| 35 | <b>Supplementary Tables 1-20</b>  | <b>Page 31-50</b> |

36 **Supplementary Notes**

37 **Supplementary Note 1. Genome sequencing and assembly**

38 The genome sequencing information of are presented in Supplementary Table 1, 2,  
39 and 4. We calculated and plotted the 17-mer depth distributions of *T. rubra* and *A.*  
40 *coerulea*; the results are presented in Supplementary Figure 2 and Supplementary  
41 Table 3. The statistics for the assembly steps are listed Supplementary Table 5.  
42 Benchmarking Universal Single-Copy Orthologs (BUSCOs) assessment showed that  
43 our assembly captured 92.4% and 86.4% of the complete BUSCOs of *T. rubra* and *A.*  
44 *coerulea*, respectively. For Hi-C sequencing, the sequence interaction matrices are  
45 shown in Supplementary Figure 3, and the statistical analysis results of the  
46 chromosome assemblies of *T. rubra* (2n=30) and *A. coerulea* (2n = 44) with genomic  
47 loading rates of 95.11% and 99.71 %, respectively, are summarised in Supplementary  
48 Table 6 and 7 and schematic representation of the genomic characteristics are shown  
49 in Supplementary Figure 4. Furthermore, the pseudo-chromosome syntenic  
50 relationship between *T. rubra* and *A. coerulea* was analyzed (Supplementary Figure 5).  
51 Evaluation of the genome for completeness based on BUSCO resulted in values of  
52 92.4% and 86.4%, respectively, indicating the high completeness and accuracy of the  
53 assembly (Supplementary Table 5).

54

55 **Supplementary Note 2. Genome annotation**

56 The results of genome annotation are summarized in Supplementary Table 8. We  
57 identified a total of 18,746 and 32,035 genes from *T. rubra* and *A. coerulea* genomes,  
58 respectively (Supplementary Table 9). In total, 90.14% and 97.13% of the predicted  
59 genes were annotated using different databases in *T. rubra* and *A. coerulea*,  
60 respectively (Supplementary Table 10). For annotation of non-coding RNAs  
61 (ncRNAs), microRNAs (miRNAs) and snRNAs were predicted using Rfam (v14.1),  
62 whereas tRNAs were screened using tRNAscan-SE (v1.3.1) and rRNA was predicted  
63 using BLASTN (v2.6.0) (Supplementary Table 11). The annotation results were  
64 evaluated using BUSCO (metazoa\_odb10), and the results showed that our gene set  
65 contained 93.3% and 88.4% of complete ortholog genes of *T. rubra* and *A. coerulea*,

66 respectively (Supplementary Table 12), showing that our gene annotation was highly  
67 complete.

68

### 69 **Supplementary Note 3. Phylogenetic analysis**

70 To determine the phylogenetic positions of *T. rubra* and *A. coerulea*, phylogenetic  
71 analysis was conducted using whole-genome protein datasets of 17 cnidarians and one  
72 ctenophore as the outgroup. A stringent set of orthologues was identified. Alignment  
73 of these individual orthologous groups, followed by concatenation, resulted in amino  
74 acid alignment. Model prediction revealed that the JTT model was the best-suited  
75 substitution model for concatenated alignment. RAxML was used to generate an ML  
76 tree for alignment using the best-fit model. The phylogenetic relationships between  
77 anthozoans, hydrozoans, cubozoans, and scyphozoans were consistent with those  
78 reported in previous studies based on molecular datasets. Our phylogenomic analysis  
79 also placed *T. rubra* within Hydrozoa and appeared to be a sister to *C. hemisphaerica*.  
80 The divergence times were estimated using the Markov chain Monte Carlo (MCMC)  
81 tree in PAML with calibration. Concatenated supergenes and species trees were used  
82 as input files.

83

### 84 **Supplementary Note 4. Expansion and contraction of gene families**

85 Gene expansion and contraction results for each branch of the phylogenetic tree were  
86 estimated. *T. rubra* harbored 81 significantly expanded and 278 significantly  
87 contracted gene families (Supplementary Figure 6, Supplementary Data 10). GO and  
88 KEGG enrichment analysis of contracted gene families in *T. rubra* were conducted by  
89 the GOseq R package and KOBAS software, respectively. A full list of the  
90 significantly enriched pathways is shown in Supplementary Data 11.

91

### 92 **Supplementary Note 5. Gene loss**

93 The lost gene families found in R language and manually searched are presented in  
94 Supplementary Data 12. A broader comparison of four vertebrates was conducted to  
95 confirm the number of genes or families associated with statocyst/otolith formation,

96 cilia, and nerves in compared species. GO and KEGG enrichment analysis of lost  
97 gene families in *T. rubra* were conducted by the GSeq R package and KOBAS  
98 software, respectively. All significantly enriched pathways are listed in  
99 Supplementary Data 13.

100

#### 101 **Supplementary Note 6. Positive selection of genes**

102 A total of 548 PSGs were identified in *T. rubra* (FDR < 0.05) (Supplementary Data 1).  
103 The dN/dS value was provided in the Supplementary Data 2. Notably, among these  
104 genes, we found several genes that play important roles in the statolith morphogenesis,  
105 ciliary movement, ciligenesis and some modulators that have been reported to be  
106 important for the statolith formation process (Supplementary Table 14). Genes  
107 involved in the nervous and muscular systems were also identified. GO and KEGG  
108 enrichment analyses were also conducted by the GSeq R package and KOBAS  
109 software. GO enrichment of positive selected genes (PSGs) in *T. rubra* is shown in  
110 Supplementary Data 3. Comparison of the amino acid substitutions of PSGs shown in  
111 Fig. 3b in different species were performed using MEGA-X v10.1.8, and sequences of  
112 four vertebrate species were obtained from NCBI, the GenBank accession numbers of  
113 these genes are listed in Supplementary Table 14.

114

#### 115 **Supplementary Note 7. Transcriptome analyses**

116 The RNA sequencing information of two tissues (sensory organs and bell margins as  
117 controls) of four species (*C. quinquecirrha*, *R. esculentum*, *A. coerulea*, and *T. rubra*)  
118 is listed in Supplementary Data 4. Principal-component analysis (PCA) based on four  
119 species normalization genes of combined 32 transcriptomes suggested that there were  
120 more variations between species than between tissues (Supplementary Figure 7).  
121 DEGs in the tentacle bulbs of *T. rubra* with the rhopilia of the other three jellyfish  
122 were obtained using cross-species transcriptome comparisons of sensory organs  
123 (Supplementary Figure 8, Supplementary Data 5). GO and KEGG enrichment  
124 analysis of downregulated DEGs in *T. rubra* were conducted by the GSeq R package  
125 and KOBAS software, respectively. All significantly enriched pathways are listed in

126 Supplementary Data 6, and the top 20 significantly enriched GO terms for the  
127 downregulated DEGs in the tentacle bulb of *T. rubra* are shown for biological  
128 processes (BPs) and cellular components (CCs) in Supplementary Figure 9.

129 The DEGs information of the sensory organs compared with the control  
130 samples in each species is shown in Supplementary Figure 10, and 11, Supplementary  
131 Table 15 and Supplementary Data 7. The full list of significantly enrichment gene  
132 ontologies of the upregulated and downregulated DEGs in the sensory organs in each  
133 species (P-value <0.05) is shown in Supplementary Data 8. KEGG enrichment of  
134 cilium-related DEGs in the four jellyfish species (P-value<0.05) is shown in  
135 Supplementary Data 9.

136

#### 137 **Supplementary Note 8. RNAi experiment and RT-qPCR**

138 The sequences of RNAi are provided in Supplementary Table 16. At the end of the  
139 RNAi experiment, polyps were observed, and the number of individuals at each stage  
140 of strobilation was recorded. The result is shown in Supplementary Figure 13a. The  
141 expression of target genes was assessed using RT-qPCR analysis, and the si-OM and  
142 si-LRR groups exhibited significant downregulation of gene expression, validating the  
143 efficacy of the siRNA treatment (Supplementary Figure 13b,  $p < 0.001$ ;  
144 Supplementary Data 14). The RT-qPCR primer sequence of select gene are shown in  
145 Supplementary Table 17.

146

#### 147 **Supplementary Note 9. Variation of the transcriptional expression profile of hair, 148 neural, and muscle cells between *T. rubra* and *A. coerulea*.**

149 The sc-RNA sequencing information of *T. rubra* and *A. coerulea* medusa is listed in  
150 Supplementary Table 18. We generated cell atlas of medusa *T. rubra* and *A. coerulea*  
151 contain 22245 cells and 18936 cells, respectively, and the number of RNA detected  
152 and UMI per cell are shown in Supplementary Figure 14. The 18 putative cell clusters  
153 (associated markers in parentheses) with a resolution of 0.2 were assigned to 10 broad  
154 partitions and were annotated manually by combining analysis of underlying

155 molecular profiles and prior knowledge (Supplementary Figure 15; Supplementary  
156 Data 15). Stem/germ cells (*PCNA* and *NANOS*) were dominant in *T. rubra*, whereas  
157 glands (trypsin, chitinase, and *MUC2*) and nematoblasts (nematoglectin and *DKK3*)  
158 were dominant in *A. coerulea*. Gene expression in the hair cells of *T. rubra* and *A.*  
159 *coerulea* was compared and species-specific gene sets were clearly visualised. The  
160 DEGs in hair cells from *T. rubra* and *A. coerulea* are shown in Supplementary Data  
161 16. GO enrichment analysis of the DEGs was conducted using the Goseq R package,  
162 and the full list of enriched terms is shown in Supplementary Data 17.

163 The list of different expressed genes (DEGs) in neural s and striated muscle between  
164 *T. rubra* and *A. coerulea* is shown in Supplementary Data 18 and 20, and GO  
165 enrichment terms are shown in Supplementary Data 19 and 21.

166

167 **Supplementary Note 10. Single-cell transcriptional profiles of cyst (Cy)**  
168 **formation in *T. rubra*.**

169 ScRNA-seq analysis was conducted on single cells sampled across five crucial life  
170 stages: medusa (Me), four-leaf structure (Ff), cyst (Cy), polyp (Po), and planula (Pl)  
171 (Supplementary Table 19). To facilitate comparative analyses across different  
172 developmental stages, we integrated the expression data from all libraries into a  
173 unified dataset and utilized the Harmony package (fast, sensitive, and accurate  
174 integration of single-cell data with Harmony) to mitigate batch effects. In total, we  
175 obtained a high-quality dataset comprising 44954 cells expressing 15478 genes, with  
176 a median of 668 genes per cell and 1521 unique molecular identifiers (UMIs) per cell,  
177 representing five critical stages of development. To construct a cell atlas, we  
178 performed a clustering analysis on the gene expression matrix, resulting in the  
179 identification of 36 distinct cell clusters. The cellular landscape was visualized using  
180 the uniform manifold approximation and projection (UMAP) technique. The 36  
181 clusters were confidently assigned to six broad (associated markers in parentheses)  
182 cell types based on known markers and prior annotations (Fig. 5a), including  
183 stem/germ cells (*CNIWI*, *NANOS* and *PCAN*), gastroderm (*CTSZ* and *CTSB*),

184 epidermal/muscle cells (*MYHCKB* and *MYH2*), nematocytes (minicollagen and  
185 nematogalectin), neural cells (*SYT16* and neuocalcin), gland cells (chitinase 2 and  
186 *CELA3B*), and hair cell (myosin-VI, *MYO7A*, *PO4F3*). DEGs of *T.rubra* across  
187 different life stages are shown in Supplementary Data 25. The KEGG and GO  
188 enrichment analyses of cysts and planula in *T. rubra* (P-value < 0.05) are shown in  
189 Supplementary Data 23 and Supplementary Data 24, respectively.

190

#### 191 **Supplementary Note 11. Whole-mount in situ hybridisation protocol**

192 Whole-mount in situ hybridised animals that had been starved for at least 2 days were  
193 relaxed in 2% MgCl<sub>2</sub> (in 0.22 µm filtered seawater) for 5–10 min and subsequently  
194 fixed overnight at 4 °C in 4% paraformaldehyde. Thereafter, the specimens were  
195 dehydrated using a 25/50/75% MeOH series to remove undesired pigmentation and  
196 stored in 100% MeOH at -20 °C. The samples were rehydrated with a 75/50/25%  
197 MeOH series for 10 min each, followed by a 10-minute PBT wash, and then bleached  
198 in a 3% H<sub>2</sub>O<sub>2</sub>/PBT solution for 10 min. Animals were permeabilized for 10–20 min  
199 with 1 µg/ml proteinase K (Sigma) in PBT after three 10-min PBT washes. Protease  
200 digestion was stopped by a quick wash and a 10-min wash with 4 mg/ml glycine in  
201 PBT, followed by three 10-min PBT washes to remove residual glycine. The samples  
202 were washed twice with 0.1 M triethanolamine for 10 min, and then treated with 2.5  
203 µl/ml and 5 µl/ml acetic anhydride in 0.1 M triethanolamine (pH 7.8) for 5 min each  
204 to reduce probe nonspecific binding. Hereafter, the samples were refixed overnight  
205 with 4% paraformaldehyde at 4 °C.

206 The fixative was thoroughly washed with three 10-min PBT washes and two  
207 10-min 2× SSC washes. The animals in 2× SSC were transferred to a 70 °C water  
208 bath for 20 min. Prehybridization and hybridization were all carried out in  
209 hybridization oven at 57 °C. Prehybridization step was performed in hybridization  
210 buffer (50% Formamid, 5× SSC, 0.1% Tween-20, 0.1% CHAPS, 1× Denhardt's  
211 solution and 100µg/ml Heparin in DEPC water) with 0.5 mg/ml torula yeast RNA  
212 (Sigma; #R6625-25G) for 2 hours. For hybridisation, all probes denatured at 70 °C for



213 5 min were used at 10 ng/ml in hybridisation buffer with 0.5 mg/ml torula yeast RNA  
214 to improve signal-to-noise and hybridised for 24 hours with gentle agitation.

215 Unhybridized probes were washed away with pre-warmed solutions at 57 °C  
216 using 100% HS, 75% HS/25% 2× SSC, 50% HS/50% 2× SSC and 25% HS/75% 2×  
217 SSC for 10 min each, as well as 2× SSC with 0.1% CHAPS for two 30-min. This was  
218 followed by two 10-min washes with MAB-T (100 mM maleic acid, 150 mM NaCl,  
219 0.1% Tween 20, pH 7.5). The samples were incubated in MAB-T with 1% BSA  
220 Fraktion V (Coolaber; # CA1381-10G) for 1 hour at RT, after which it was blocked at  
221 4 °C for 2 hours in 1 ml blocking solution (80% MAB-T with 1% BSA and 20%  
222 sheep serum (Solarbio; #SL039)). The samples were incubated overnight with 1:2000  
223 anti-DIG AP (Roche; #11093274910) in a blocking solution at 4 °C.

224 The samples then were washed nine times with MAB-T for 20 min each, rinsed  
225 with NTMT (100 mM NaCl, 100 mM Tris-HCl, 50 mM MgCl<sub>2</sub>, and 0.1% Tween-20  
226 in DEPC water, pH 9.5) for 10 min, and developed in the presence of NBT/BCIP  
227 substrate (Roche; #11175041910) at RT in the dark. The colour reaction was stopped  
228 by three PBT washes, and background staining was cleared by incubation in 70% and  
229 100% EtOH. The samples were sequentially cleared with 80% glycerol. The primer  
230 sequences are listed in Supplementary Table 20.

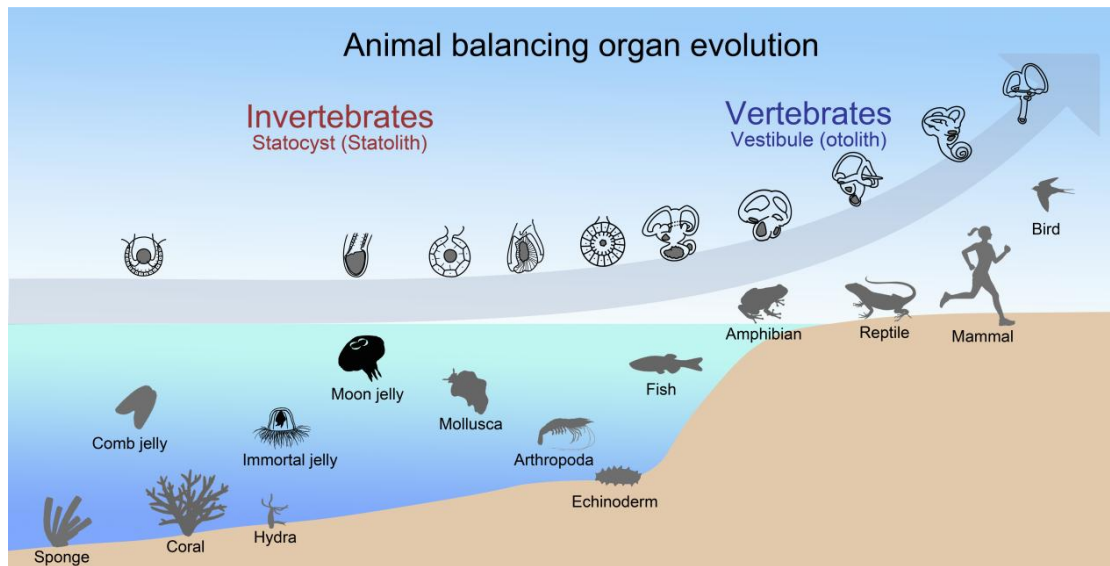

231

232 **Supplementary Figure 1.**

233 Balancing organs in Eumetazoa range from simple statocysts in aquatic invertebrates  
 234 to complex vestibules in mammals, which comprise mass blocks of calcium crystals  
 235 (statolith/otolith), proteoglycans and collagen, together with sensory hair cells  
 236 mechanically influenced by the position of the mass blocks. The silhouette images of  
 237 species were downloaded from BioRender. com except for echinoderm, hydra,  
 238 immortal jelly and moon jelly.

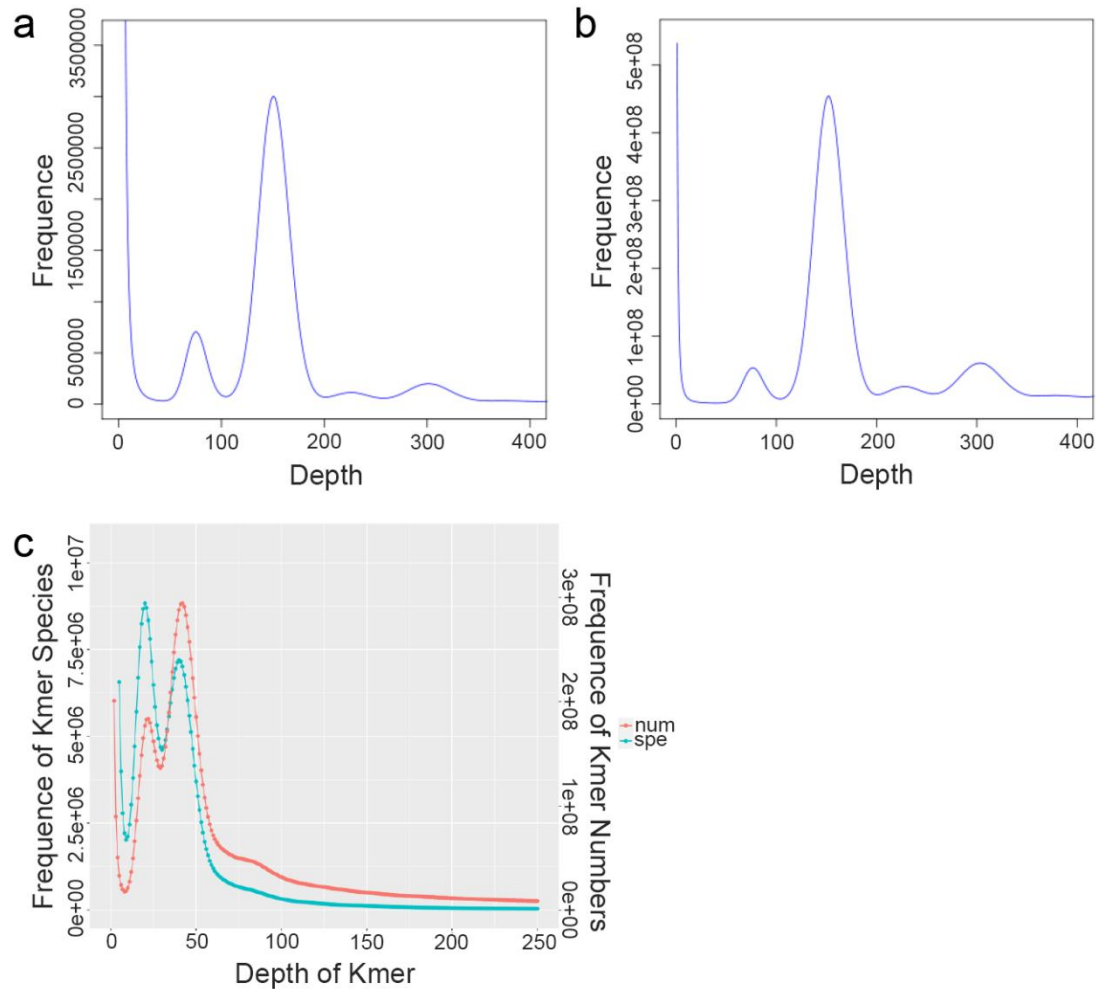

239

240 **Supplementary Figure 2.**

241 *K-mer* distribution of the *T.rubra* (a, b) and *A. coerulea* (c) genomes. The *K-mer*  
 242 spectrum was constructed based on a 17-mer. The figure shows the *K-mer* spectrum  
 243 of raw reads. The x-axis represents the *K-mer* depth, whereas the y-axis represents the  
 244 frequency of *Kmer* species (a, c) and numbers (b, c). The *Knum* of the *T.rubra* and *A.*  
 245 *coerulea* genomes were 40,775,603,666 and 23130475928 based on the 17-mer. The  
 246 *Kdepth* were 151 and 40, respectively.

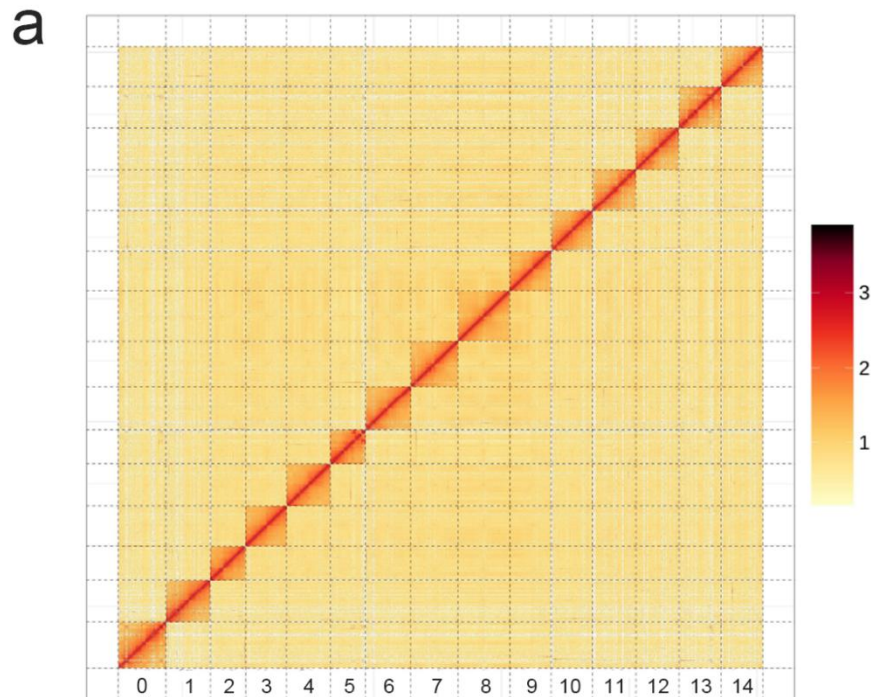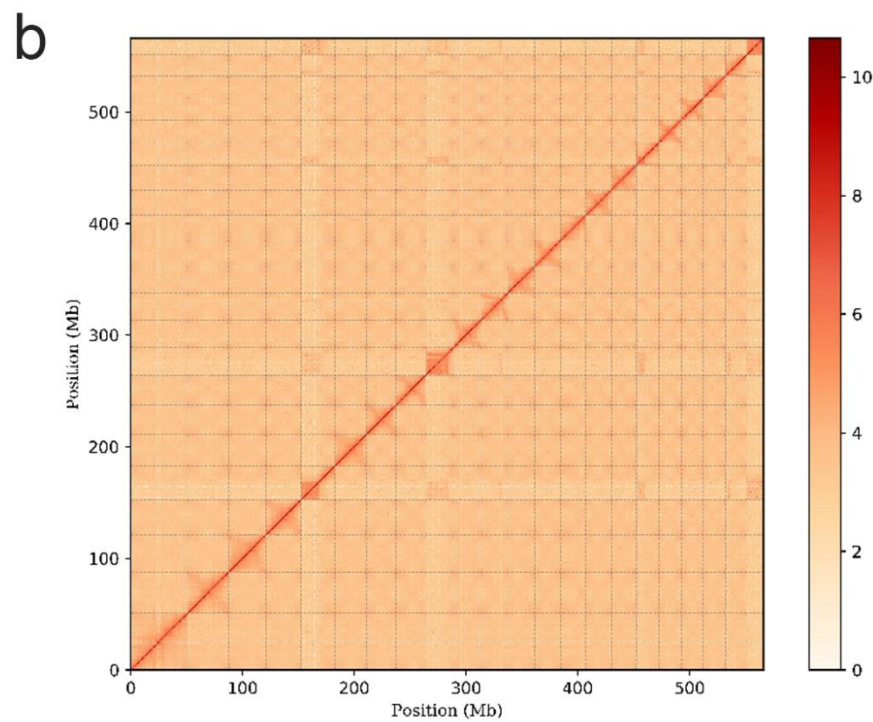

247

248 **Supplementary Figure 3.**

249 Hi-C contact maps of *Trubra* (a) and *A. coerulea* (b) genome assemblies.

250 Chromosome-level genome assemblies comprising 15 and 22 chromosome-level

251 scaffolds, respectively.

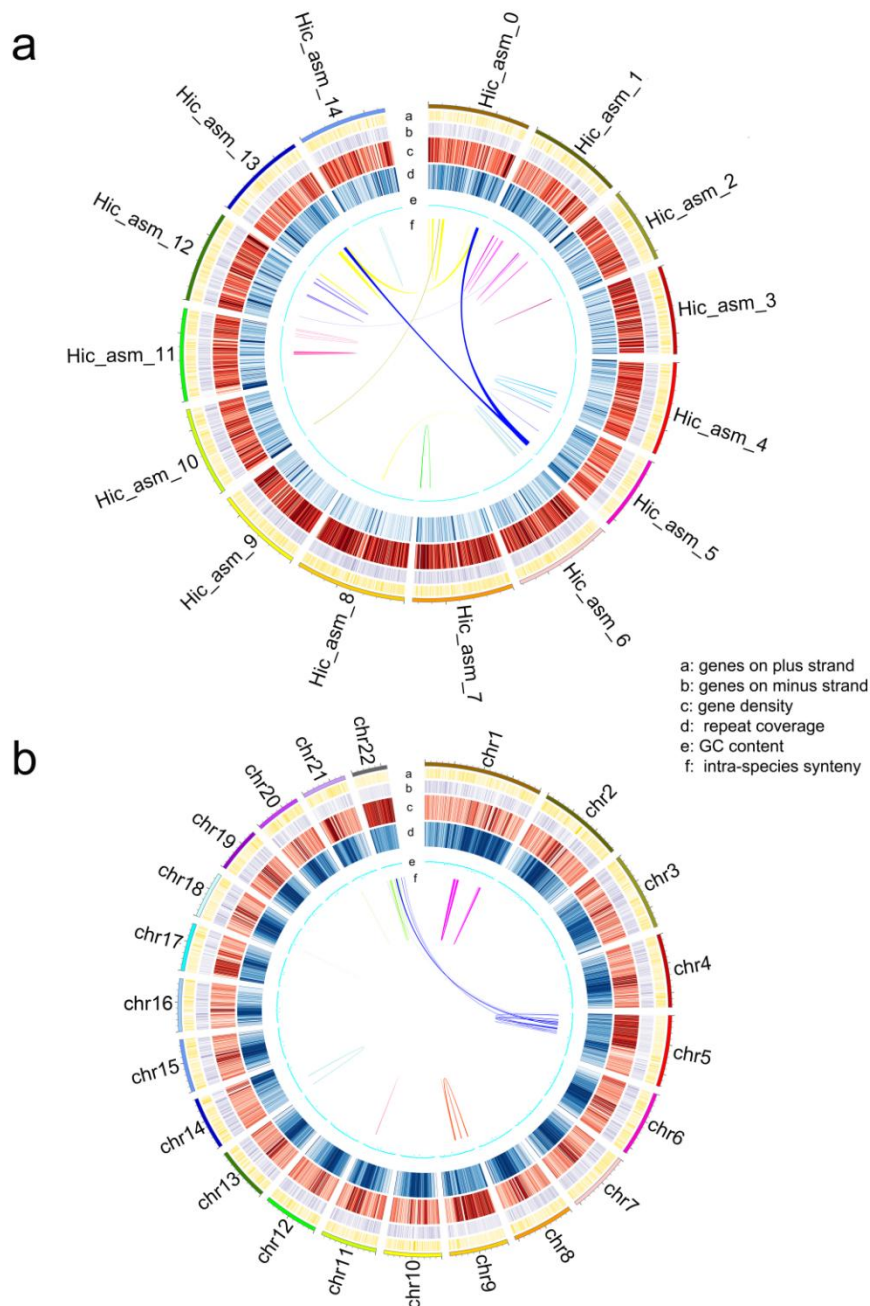

252

253 **Supplementary Figure 4.**

254 Schematic representation of the genomic characteristics of *T.rubra* (a) and *A. coerulea*

255 (b). Track a: Protein coding genes on plus strand. Track B: Protein coding genes on

256 minus strand. Track C: Distribution of gene density with sliding windows of 1 Mb.

257 Higher density is shown in darker red colour. Track D: Distribution of GC content in

258 the genome. Track E: Distribution of repeats in the genome. Track F: Schematic

259 presentation of major interchromosomal relationships. Source data are provided as a

260 Source Data file.

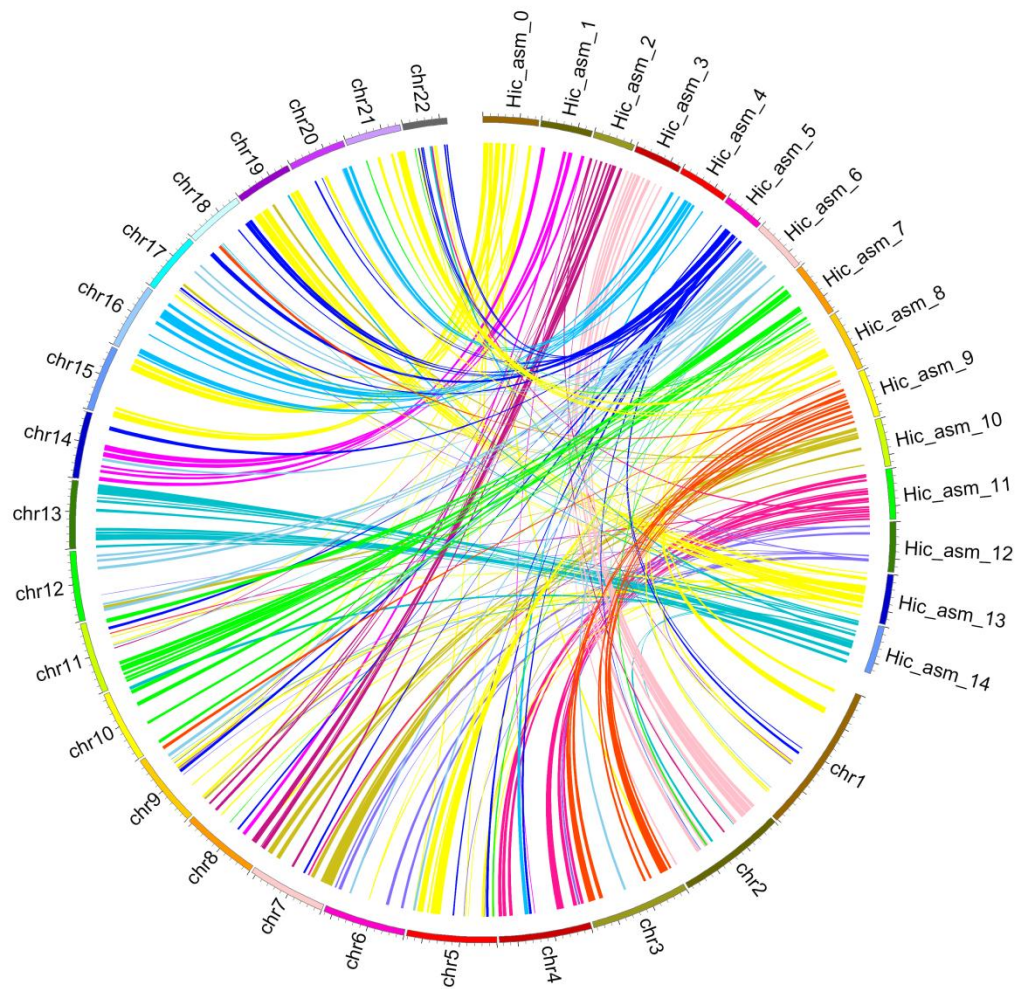

261

262 **Supplementary Figure 5.**

263 The chromosome synteny of *T. rubra* and *A. coerulea*. Source data are provided as a

264 Source Data file.

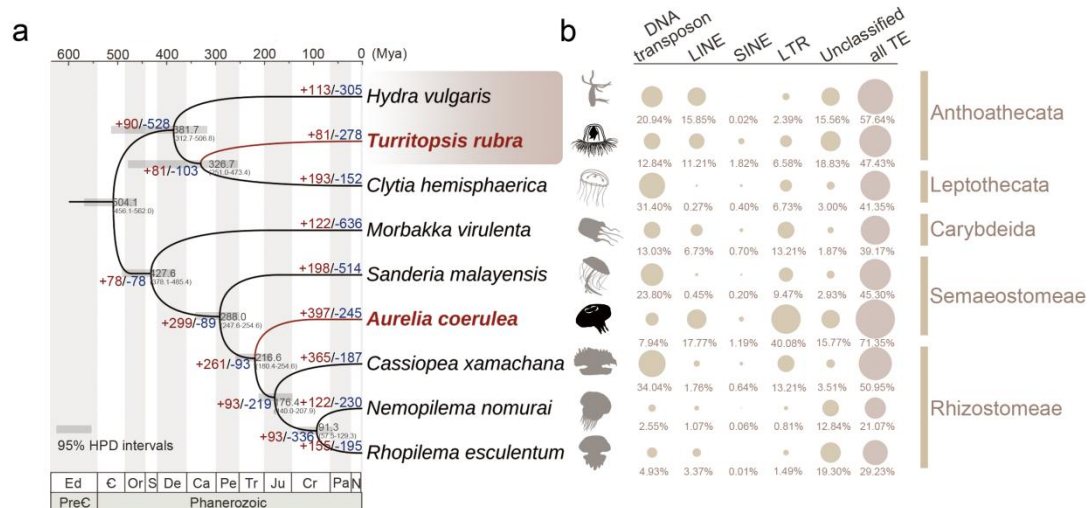

265

266 **Supplementary Figure 6.**

267 The numbers near each branch indicate the number of substantially expanded (red)

268 and contracted (blue) gene families. *Hydra vulgaris* and *Turritopsis rubra*, which lack

269 statocysts are presented in the red box. (b) Percentages of transposable elements (TEs)

270 studied in the different jellyfish genomes studied. LINE, long interspersed element;

271 SINE, short, interspersed element; LTR, long terminal repeats.

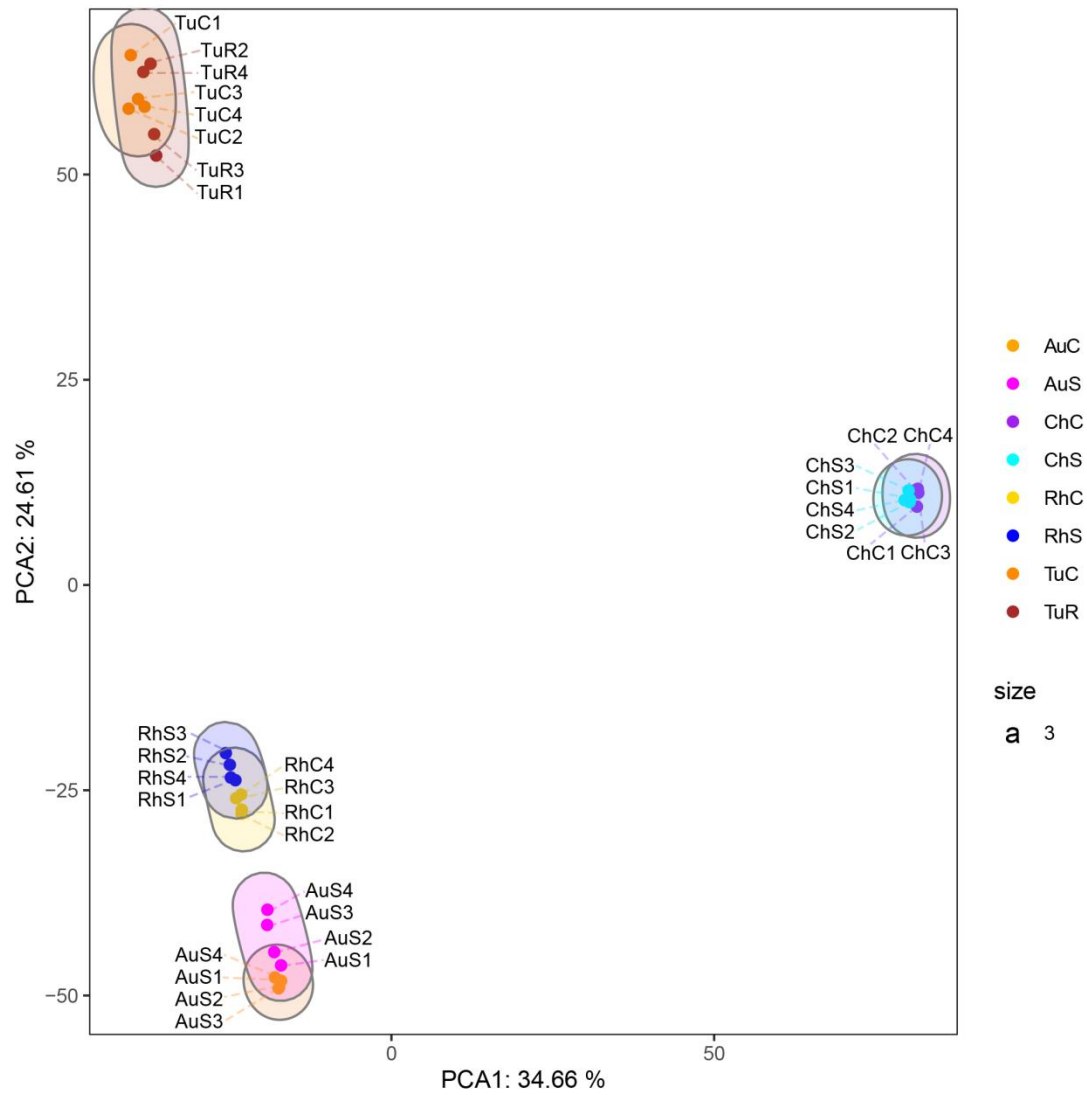

272

273 **Supplementary Figure 7.**

274 The principal-component analysis (PCA) clustered the 32 samples. The legend

275 represents sample names in **Supplementary Table 15**. Source data are provided as a

276 Source Data file.



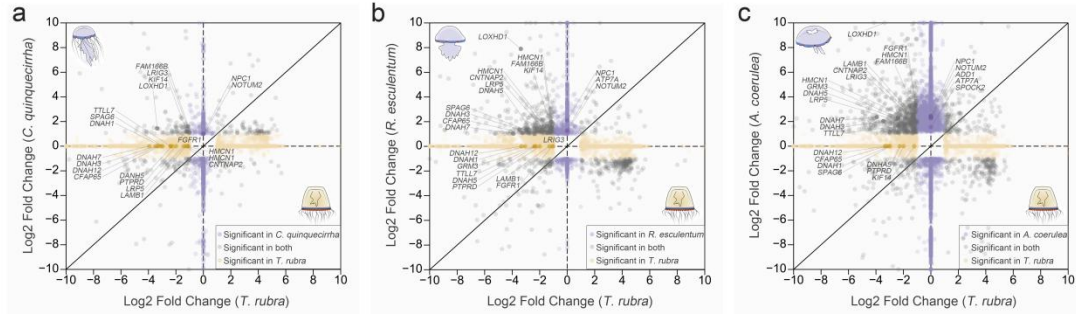

277

278 **Supplementary Figure 8.**

279 Volcano map of the shared and group-specific DEGs in the sensory organ and control  
 280 samples of *C. quinquecirrha* (a), *R. esculentum* (b) and *A. coerulea* (c) compared to  
 281 that in *T. rubra*. Yellow, purple and gray represent significantly changed DEGs in *T.*  
 282 *rubra*, scyphozoan and both groups, respectively. Source data are provided as a  
 283 Source Data file.

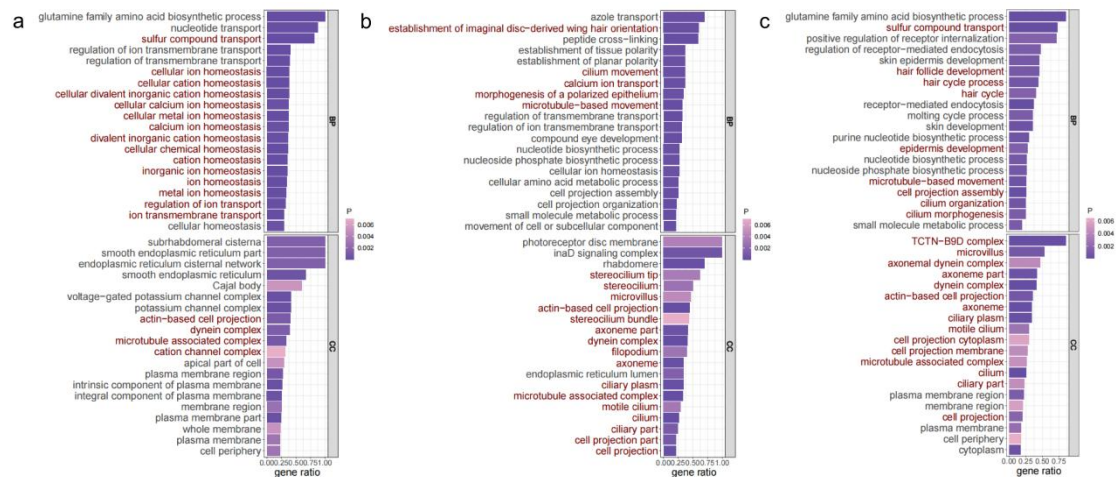

284

285 **Supplementary Figure 9.**

286 Top 20 enriched GO terms for downregulated DEGs in the tentacle bulb of *T. rubra*  
 287 compared to three scyphozoan (a. *C. quinquecirrha*, b. *R. esculentum* and c. *A.*  
 288 *coerulea*) are shown for biological processes (BPs) and cellular components (CCs).  
 289 Categories involved in cilium are coloured in red. The enrichment was conducted  
 290 using the Goseq R package and corrected  $P < 0.05$  indicated significant enrichment.  
 291 The complete categories are listed in Supplementary Data 6 ( $P < 0.05$ ). Source data  
 292 are provided as a Source Data file.

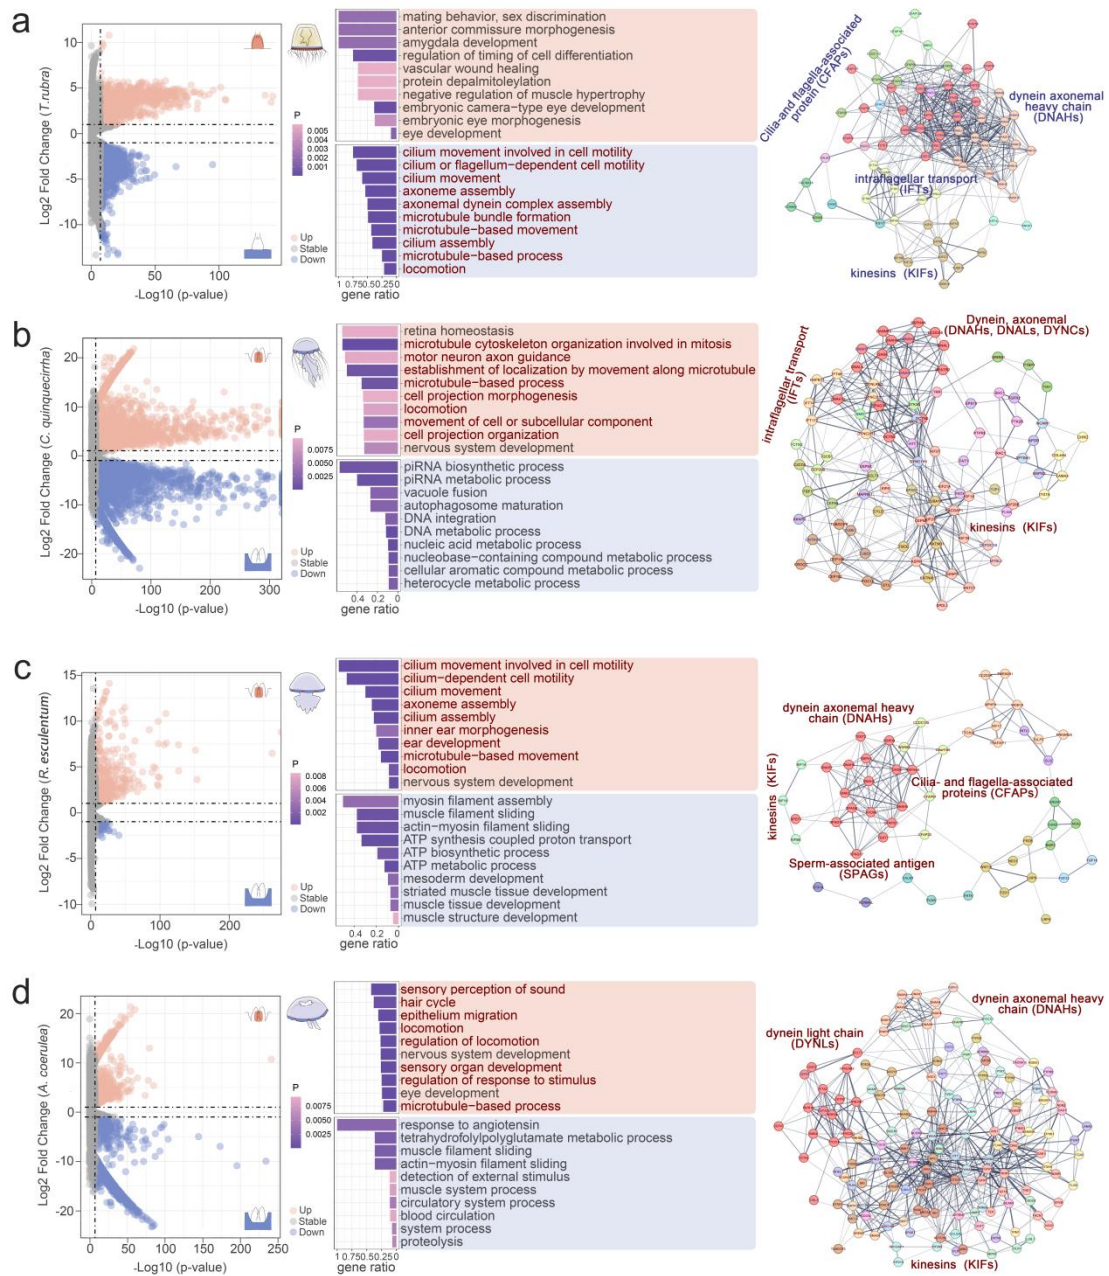

293

294 **Supplementary Figure 10.**

295 Volcano maps of differentially expressed genes (DEGs) in the sensory organs and  
 296 control tissues of *Turritopsis rubra* (a), *Chrysaora quinquecirrha* (b), *Rhopilema*  
 297 *esculentum* (c), and *Aurelia coerulea* (d), and significantly enriched Gene Ontology  
 298 (GO) terms (biological processes,  $p < 0.01$ ) of up-regulated and down-regulated  
 299 DEGs in each species. Categories involved in cilium are coloured in red. The  
 300 complete categories are listed in Supplementary Data 8 ( $P < 0.05$ ). The interaction  
 301 networks of cilium-related DEGs for each species are displayed in the right panel. The  
 302 red and blue protein names in bubbles indicate up-regulated and down-regulated

303 proteins, respectively, in the sensory organ of each species. Edges represent  
304 protein–protein associations made using the STRING database with a medium  
305 confidence level (0.4). Coloured ellipses depict the regrouping of the closest clusters.  
306 The network of all the interactors was determined using Markov Clustering MCL  
307 (inflation parameter set to 3.0). Line thickness indicates the strength of evidence, with  
308 thicker connections representing higher confidence in the protein–protein interaction.  
309 Source data are provided as a Source Data file.

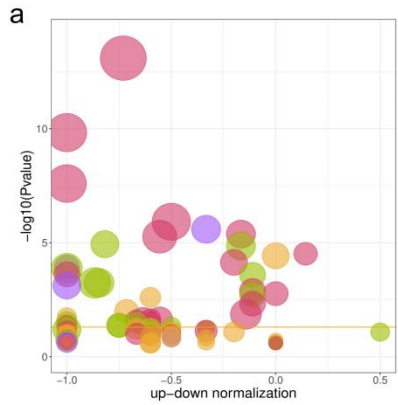

Pathway Top 20

| ID      | Description                                              |
|---------|----------------------------------------------------------|
| ko05022 | Pathways of neurodegeneration – multiple diseases        |
| ko05016 | Huntington disease                                       |
| ko05014 | Amyotrophic lateral sclerosis                            |
| ko05200 | Pathways in cancer                                       |
| ko04550 | Signaling pathways regulating pluripotency of stem cells |
| ko05224 | Breast cancer                                            |
| ko05165 | Human papillomavirus infection                           |
| ko04512 | ECM-receptor interaction                                 |
| ko04310 | Wnt signaling pathway                                    |
| ko05217 | Basal cell carcinoma                                     |
| ko04916 | Melanogenesis                                            |
| ko05226 | Gastric cancer                                           |
| ko04540 | Gap junction                                             |
| ko04151 | PI3K-Akt signaling pathway                               |
| ko05032 | Morphine addiction                                       |
| ko04390 | Hippo signaling pathway                                  |
| ko04024 | cAMP signaling pathway                                   |
| ko04020 | Calcium signaling pathway                                |
| ko04510 | Focal adhesion                                           |
| ko05225 | Hepatocellular carcinoma                                 |

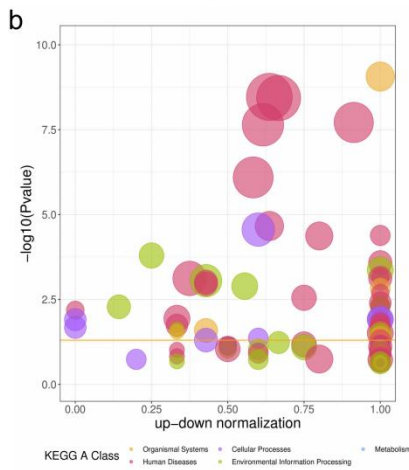

Pathway Top 20

| ID      | Description                                       |
|---------|---------------------------------------------------|
| ko04962 | Vasopressin-regulated water reabsorption          |
| ko05022 | Pathways of neurodegeneration – multiple diseases |
| ko05014 | Amyotrophic lateral sclerosis                     |
| ko05132 | Salmonella infection                              |
| ko05016 | Huntington disease                                |
| ko05200 | Pathways in cancer                                |
| ko05224 | Breast cancer                                     |
| ko04510 | Focal adhesion                                    |
| ko05216 | Thyroid cancer                                    |
| ko05226 | Gastric cancer                                    |
| ko04350 | TGF-β signaling pathway                           |
| ko01521 | EGFR tyrosine kinase inhibitor resistance         |
| ko04013 | MAPK signaling pathway – fly                      |
| ko05144 | Malaria                                           |
| ko01522 | Endocrine resistance                              |
| ko05165 | Human papillomavirus infection                    |
| ko04151 | PI3K-Akt signaling pathway                        |
| ko05222 | Small cell lung cancer                            |
| ko05146 | Amoebiasis                                        |
| ko04512 | ECM-receptor interaction                          |

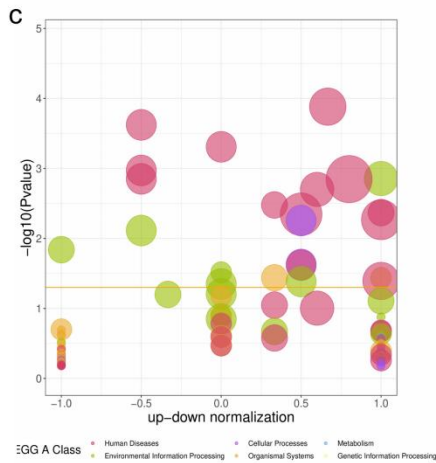

Pathway Top 20

| ID      | Description                                              |
|---------|----------------------------------------------------------|
| ko05226 | Gastric cancer                                           |
| ko05418 | Viral myocarditis                                        |
| ko05412 | Arrhythmogenic right ventricular cardiomyopathy          |
| ko05410 | Hypertrophic cardiomyopathy                              |
| ko04390 | Hippo signaling pathway                                  |
| ko05414 | Dilated cardiomyopathy                                   |
| ko05022 | Pathways of neurodegeneration – multiple diseases        |
| ko05224 | Breast cancer                                            |
| ko05218 | Melanoma                                                 |
| ko05217 | Basal cell carcinoma                                     |
| ko05200 | Pathways in cancer                                       |
| ko05016 | Huntington disease                                       |
| ko04550 | Signaling pathways regulating pluripotency of stem cells |
| ko04512 | ECM-receptor interaction                                 |
| ko04350 | TGF-β signaling pathway                                  |
| ko04810 | Regulation of actin cytoskeleton                         |
| ko05205 | Proteoglycans in cancer                                  |
| ko04016 | MAPK signaling pathway – plant                           |
| ko04916 | Melanogenesis                                            |
| ko04911 | Insulin secretion                                        |

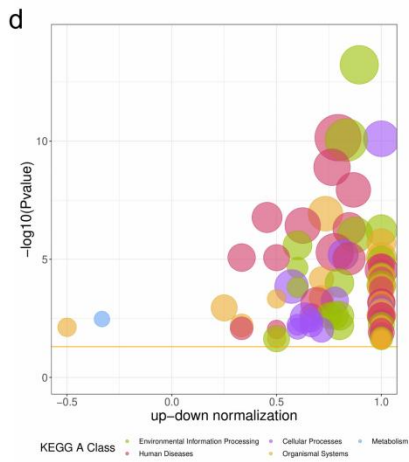

Pathway Top 20

| ID      | Description                                              |
|---------|----------------------------------------------------------|
| ko04390 | Hippo signaling pathway                                  |
| ko05200 | Pathways in cancer                                       |
| ko04550 | Signaling pathways regulating pluripotency of stem cells |
| ko04151 | PI3K-Akt signaling pathway                               |
| ko05206 | MicroRNAs in cancer                                      |
| ko05226 | Gastric cancer                                           |
| ko04390 | Axon guidance                                            |
| ko05414 | Dilated cardiomyopathy                                   |
| ko05205 | Proteoglycans in cancer                                  |
| ko05224 | Breast cancer                                            |
| ko04391 | Hippo signaling pathway – fly                            |
| ko04010 | MAPK signaling pathway                                   |
| ko04935 | Growth hormone synthesis, secretion and action           |
| ko04350 | TGF-β signaling pathway                                  |
| ko05165 | Human papillomavirus infection                           |
| ko04110 | Cell cycle                                               |
| ko05410 | Hypertrophic cardiomyopathy                              |
| ko04722 | Neurotrophin signaling pathway                           |
| ko05412 | Arrhythmogenic right ventricular cardiomyopathy          |
| ko05225 | Hepatocellular carcinoma                                 |

311 **Supplementary Figure 11.**

312 Top 20 KEGG pathways for DEGs of the sensory organs and control tissues in *T.*  
313 *rubra* (a), *C. quinquecirrha* (b), *R. esculentum* (c) and *A. coerulea* (d). The complete  
314 categories are listed in Supplementary Data 9 ( $P < 0.05$ ).

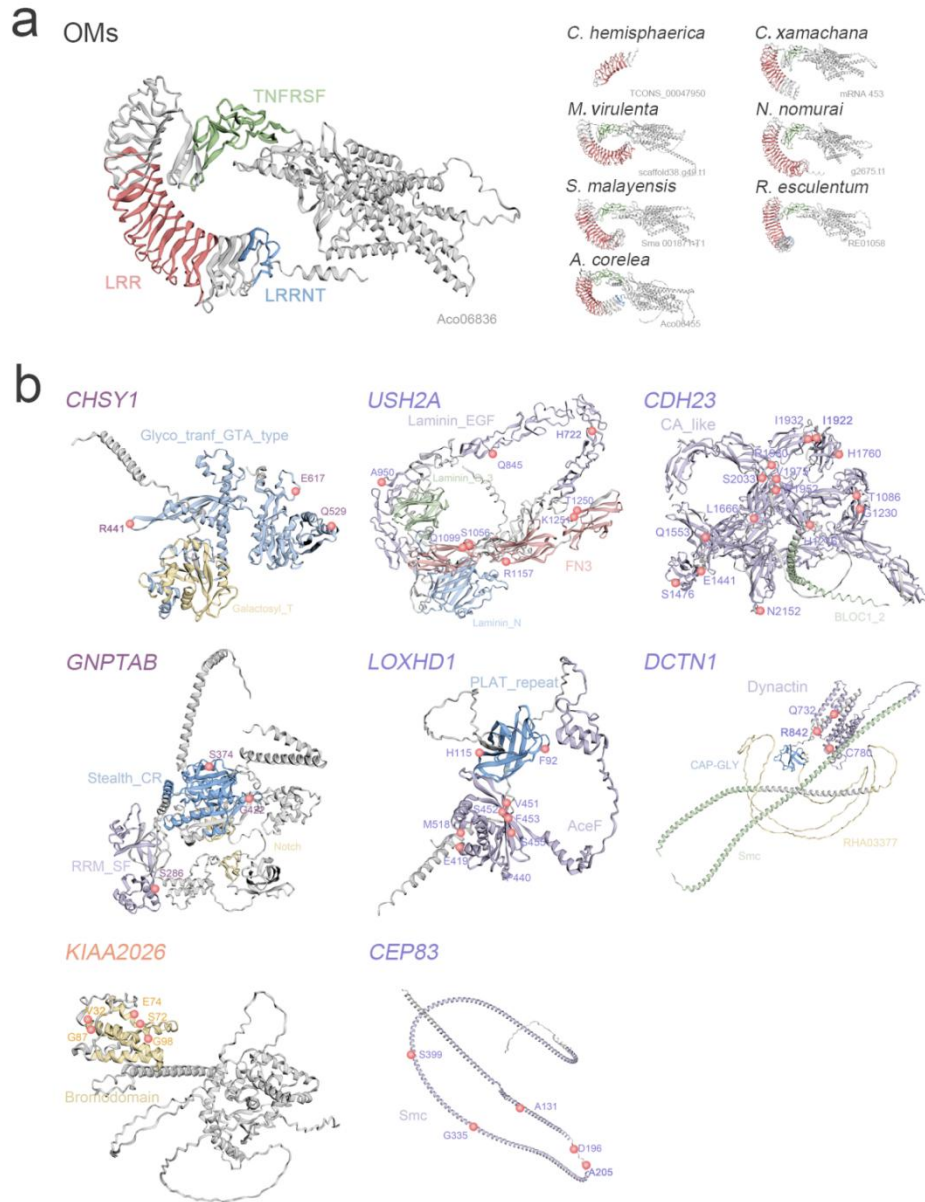

315

316 **Supplementary Figure 12.**

317 Predicted protein structures encoded by the lost otolith morphogenesis (OM) gene  
 318 family (a) and statocyst-related positively selected genes (PSGs) (b). (a) Predicted  
 319 protein structures encoded by OMs of each species revealed similar structures, with  
 320 an LRR (red) and TNFRSF (green) domains (except for *Clytia hemisphaerica*), in  
 321 addition to an LRRNT domain (blue) in front of the LRR in *Aurelia coerulea* and  
 322 *Rhopilema esculentum*. The LRR domain plays vital role in biomineralisation. (b)  
 323 Predicted protein structures encoded by some representing PSGs of Figure 2; selected  
 324 amino acids are labelled on conserved domains, which are represented in different  
 325 colours.

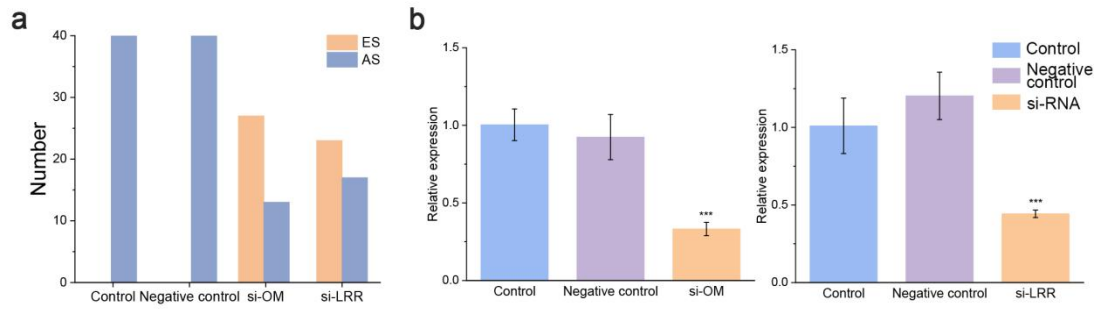

326

327 **Supplementary Figure 13.**

328 (a) The number of polyps under two stages of four groups. ES, early stage of  
 329 strobilation; AS, advanced stage of strobilation. (b) The relative expression of target  
 330 genes in the si-OM and si-LRR groups. Source data are provided as a Source Data  
 331 file.



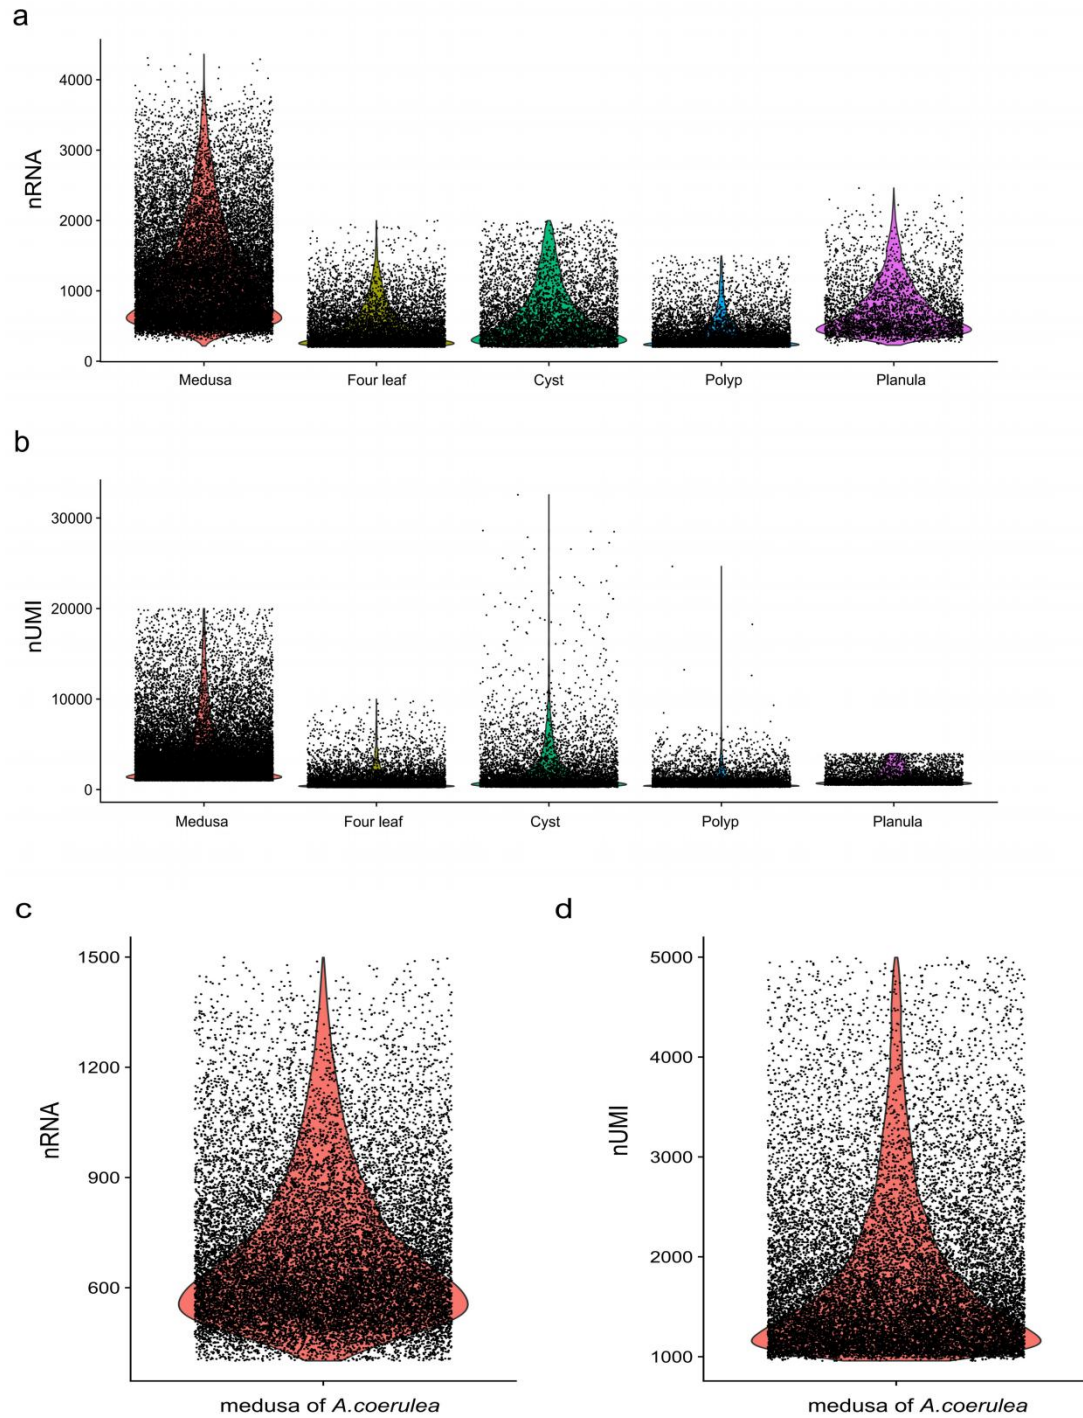

332

333 **Supplementary Figure 14.**

334 Violin plot showing the number of RNA detected (top) and UMI (bottom) per cell of  
 335 different life stage in *T. rubra* (a, b) and medusa of *A. coerulea* (c, d).

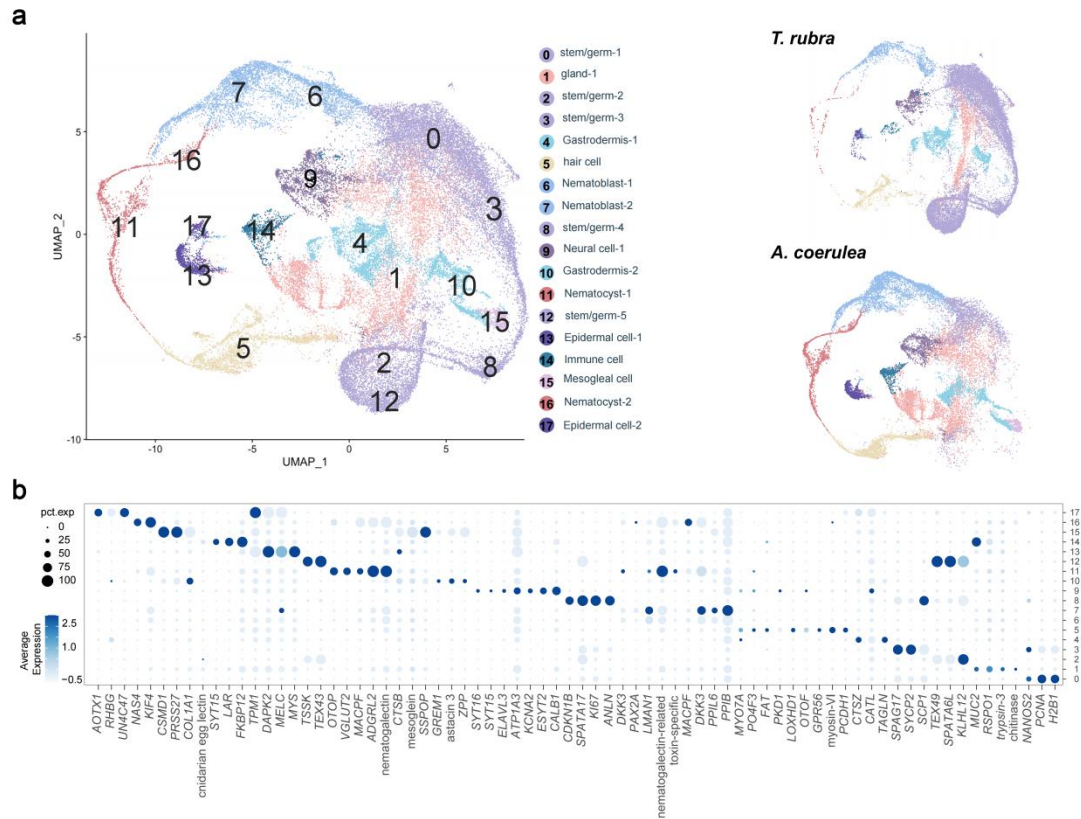

336

337 **Supplementary Figure 15.**

338 Cell atlas of the *T. rubra* and *A. coerulea*. (a) UMAP visualization of the merged  
 339 dataset (left) and each life stage (right). coloured by cluster identity from Louvain  
 340 clustering and annotated based on marker genes, cell-type colours are the same in  
 341 each life stage, associated with **Figure 4**. (b) Dot plot showing expression of selected  
 342 marker genes per cell type. Dot sizes represent percentages of cells within a cell type  
 343 in which a given marker is detected; dot intensities represent average expression  
 344 levels.

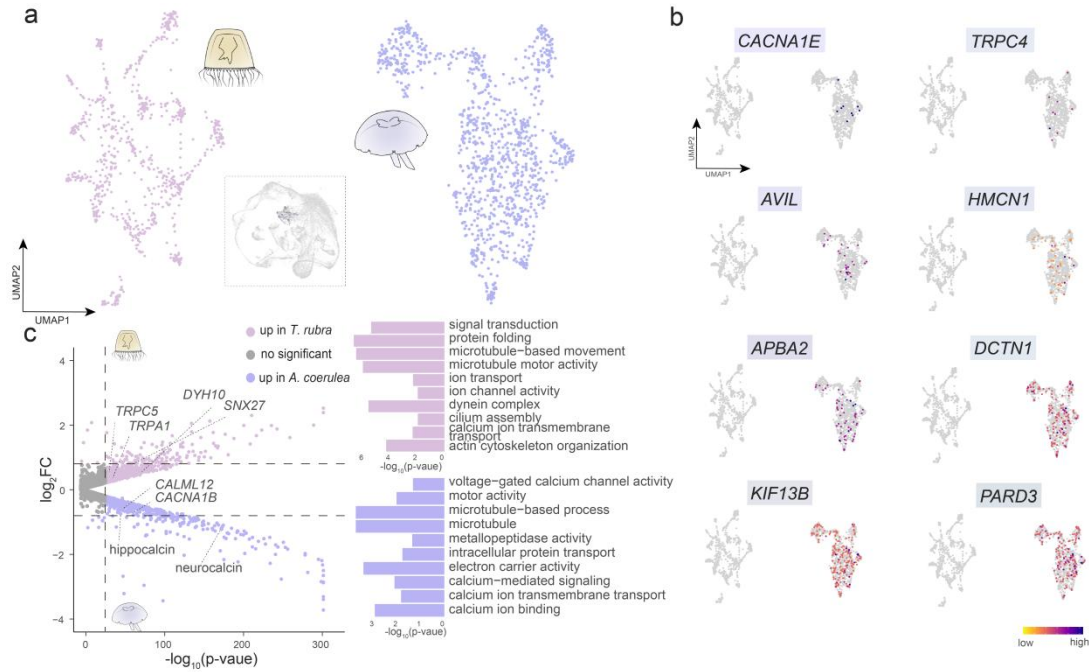

345

346 **Supplementary Figure 16.**

347 Cross-species comparison of neural cells in *Turritopsis rubra* and *Aurelia coerulea*. (a)

348 Uniform Manifold Approximation and Projection (UMAP) visualisation of neural

349 cells in the *T. rubra* and *A. coerulea* integrated medusa cell atlas. Inset: locations of

350 the neural cell cluster of the merged UMAP plot in Figure 4a. (b) Feature plots

351 visualising the expression of genes associated with neural development in neural cells.

352 (c) Volcano map (left) displaying differential gene expression between the neural cells

353 of *T. rubra* and *A. coerulea*; bar plot (right) depicts Gene Ontology (GO) analyses for

354 differentially expressed genes (DEGs). Source data are provided as a Source Data file.

355

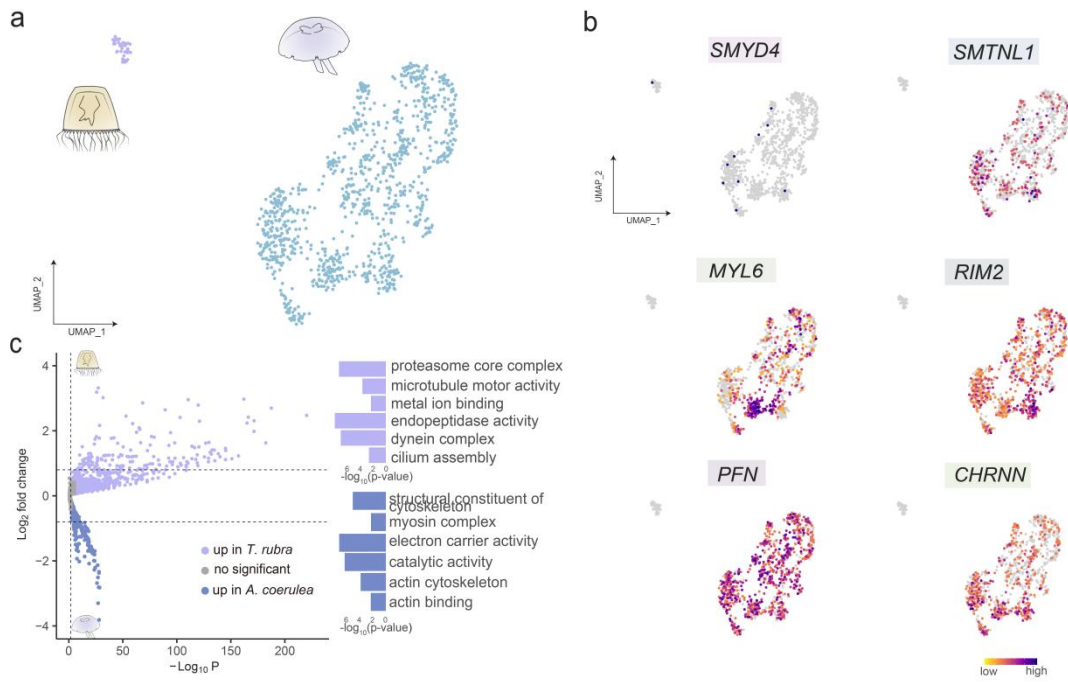

356

357 **Supplementary Figure 17.**

358 Cross-species comparison of striated muscle cells between *Turritopsis rubra* and  
359 *Aurelia coerulea* (a) Uniform Manifold Approximation and Projection (UMAP)  
360 visualisation of striated muscle cells in the *T. rubra* and *A. coerulea* integrated  
361 medusa cell atlas. (b) Feature plots showing the expression of genes associated with  
362 muscle contraction in striated muscle cells. (c) Volcano plot (left) depicting the  
363 differential gene expression between striated muscle cells of *T. rubra* and *A. coerulea*;  
364 bar plot (right) represents the Gene Ontology (GO) analyses for differentially  
365 expressed genes (DEGs). Source data are provided as a Source Data file.

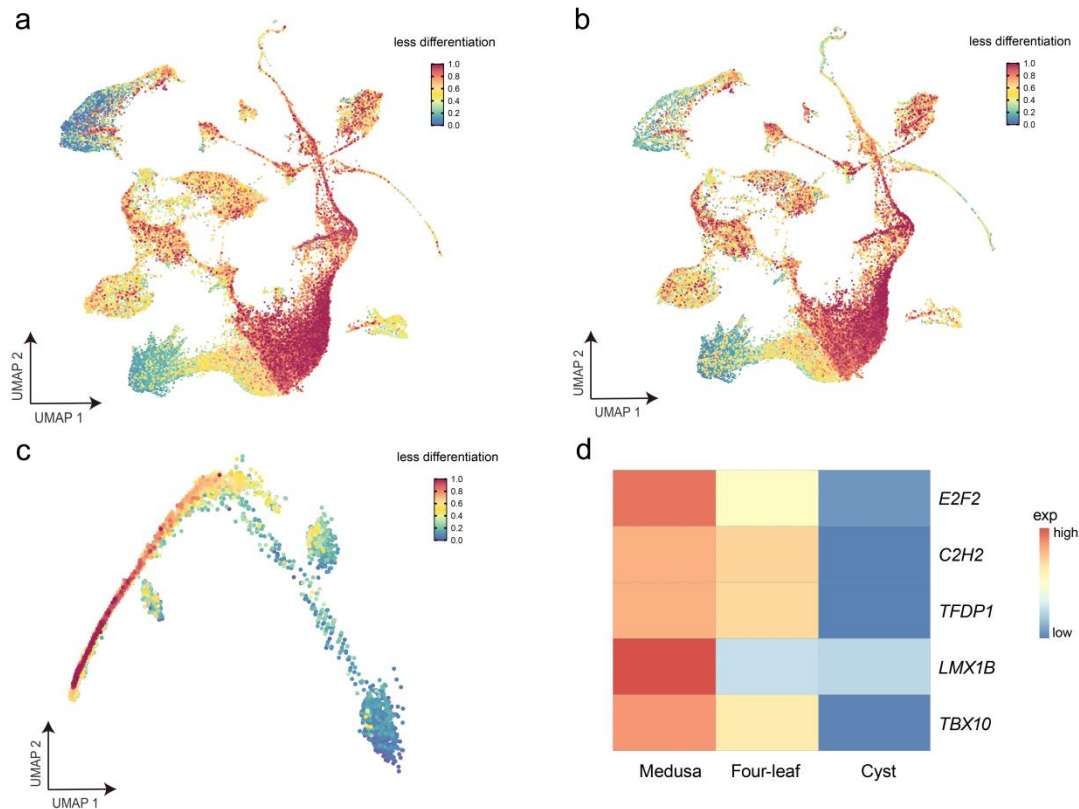

366

367 **Supplementary Figure 18.**

368 Analyses of the cell differentiation trajectory at different stages in *T. rubra*. (a-b)  
 369 UMAP visualisation of the cell differentiation potential during the normal  
 370 development stage (a) and the reverse-development stage (b) of the *T. rubra*. (c)  
 371 Dynamics of differentiation potential between stem cells and nematocytes during the  
 372 forward development process in *T. rubra*. (d) Heatmap showing the expression  
 373 dynamics of selected transcription factors related to nematocyte differentiation during  
 374 reverse development in *T. rubra*, related to Figure 5c. Source data are provided as a  
 375 Source Data file.

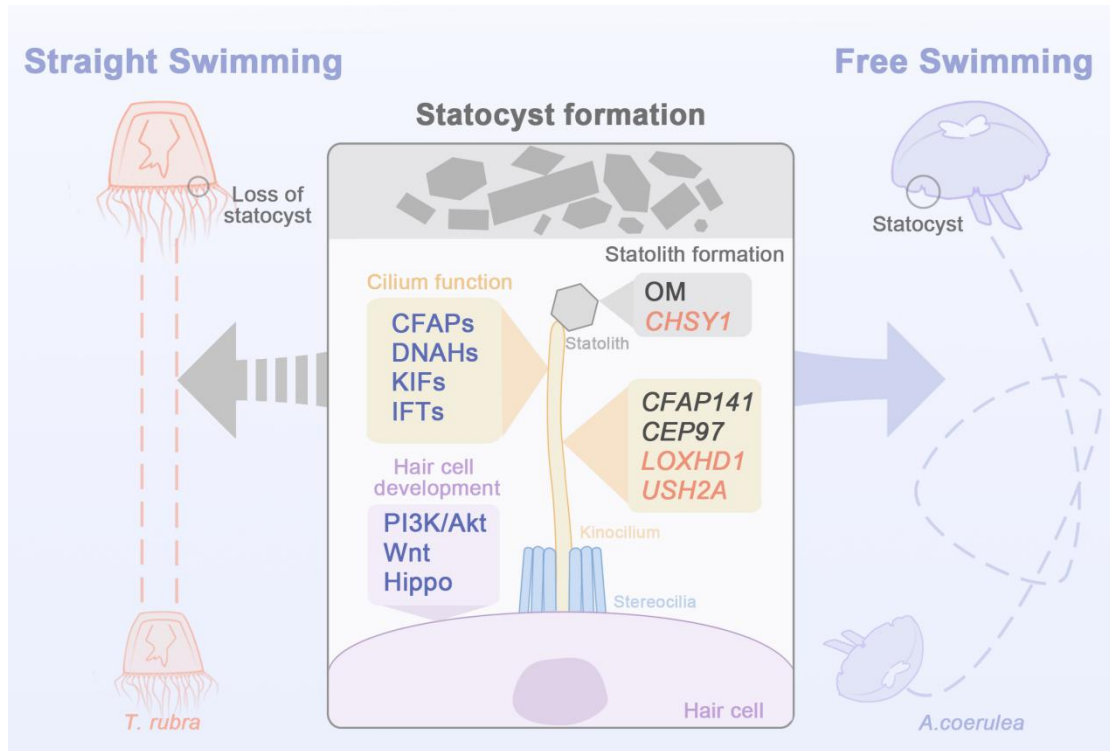

376

377 **Supplementary Figure 19.**

378 Genetic basis for the swimming patterns of *T. rubra* and *A. coerulea*. Lost genes  
 379 (grey), positively selected genes (orange), and down-regulated or non- expressed  
 380 genes and pathways (blue) in the hair cells of *T. rubra*, which are related to statocyst  
 381 formation and cilium function and may result in the loss of statocyst and  
 382 straight-swimming patterns in *T. rubra*.

383 **Supplementary Table 1. Jellyfish samples used for genome and Hi-C sequencing.**

| Species<br>Sampling | Origin                                     | Sampling<br>date | Genome<br>sequencing | Hi-C<br>sequencing | Note               |
|---------------------|--------------------------------------------|------------------|----------------------|--------------------|--------------------|
| <i>T. rubra</i>     | Yantai and<br>Dongying,<br>Shandong, China | 2021.6.5         | individual           | individual         | newly<br>sequenced |
| <i>A. coerulea</i>  | Yantai,<br>Shandong, China                 | 2021.12.4        | individual           | individual         | newly<br>sequenced |

384

385 **Supplementary Table 2. Genome sequencing data by Illumina.**

| Sample ID          | Library | Data (Gb) | Depth |
|--------------------|---------|-----------|-------|
| <i>T. rubra</i>    | 350bp   | 53.43     | 200×  |
| <i>A. coerulea</i> | 350bp   | 60.90     | 120×  |

386



387 **Supplementary Table 3. Genome size estimation with *K-mer* distribution analysis**  
388 **based on a 17-mer.**

| Sample ID          | Genome size (Mb) | Heterozygosity (%) | Repeat ratio (%) |
|--------------------|------------------|--------------------|------------------|
| <i>T. rubra</i>    | 266.51           | 0.45               | 48.17            |
| <i>A. coerulea</i> | 521.62           | 1.43               | 56.18            |

389

390 **Supplementary Table 4. Sequencing data evaluation for Hi-C assemblies.**

| Species            | Raw paired reads | Raw Base(bp)   | Clean Base(bp) | Q20(%) | Q30(%) | GC Content(%) |
|--------------------|------------------|----------------|----------------|--------|--------|---------------|
| <i>T. rubra</i>    | 12,317,885       | 3,695,365,500  | 3,685,032,300  | 97.23  | 91.97  | 35.80         |
| <i>A. coerulea</i> | 461,577,177      | 68,707,838,179 | 68,315,728,511 | 98.80  | 95.70  | 37.30         |

391

392 **Supplementary Table 5. Summary of genome sizes and assembly statistics.**

| Species            | Assembly    | Scaffold | Scaffold   | Contig | Contig N50 | Complete   | Fragmented | Missing    | Loading  |
|--------------------|-------------|----------|------------|--------|------------|------------|------------|------------|----------|
| Genome size        | size (bp)   | num      | N50(bp)    | num    | (bp)       | BUSCOs (%) | BUSCOs (%) | BUSCOs (%) | rate (%) |
| <i>T. rubra</i>    | 266,862,699 | 329      | 16,943,197 | 762    | 1,187,606  | 92.40      | 1.30       | 6.30       | 95.11    |
| <i>A. coerulea</i> | 566,061,810 | 321      | 25,260,120 | 42     | 22,395,985 | 86.40      | 6.80       | 7.20       | 99.71    |

393

394 **Supplementary Table 6. Statistics of the anchored chromosomes for *T. rubra***  
 395 **genome.**

|                 | Sequeues ID | Cluster Number | Sequeues Length |
|-----------------|-------------|----------------|-----------------|
|                 | Hic_asm_0   | 57             | 18,799,587      |
|                 | Hic_asm_1   | 42             | 17,348,683      |
|                 | Hic_asm_2   | 19             | 13,911,814      |
|                 | Hic_asm_3   | 15             | 16,302,533      |
|                 | Hic_asm_4   | 20             | 17,136,266      |
|                 | Hic_asm_5   | 27             | 13,858,914      |
|                 | Hic_asm_6   | 24             | 17,883,988      |
| <i>T. rubra</i> | Hic_asm_7   | 20             | 18,556,697      |
|                 | Hic_asm_8   | 13             | 20,379,689      |
|                 | Hic_asm_9   | 16             | 16,246,515      |
|                 | Hic_asm_10  | 30             | 16,356,653      |
|                 | Hic_asm_11  | 35             | 17,031,648      |
|                 | Hic_asm_12  | 36             | 16,943,197      |
|                 | Hic_asm_13  | 46             | 16,806,440      |
|                 | Hic_asm_14  | 48             | 16,243,415      |

396

397 **Supplementary Table 7. Statistics of the anchored chromosomes for *A.coerulea***  
 398 **genome.**

|                   | Superscaffold | Number of<br>Contigs | Length of<br>Contigs | Length of<br>Superscaffold |
|-------------------|---------------|----------------------|----------------------|----------------------------|
|                   | chr1          | 4                    | 50,743,788           | 50,745,288                 |
|                   | chr2          | 1                    | 36,548,555           | 36,548,555                 |
|                   | chr3          | 4                    | 33,598,094           | 33,599,594                 |
|                   | chr4          | 4                    | 31,316,877           | 31,318,377                 |
|                   | chr5          | 1                    | 30,607,789           | 30,607,789                 |
|                   | chr6          | 1                    | 28,066,466           | 28,066,466                 |
|                   | chr7          | 1                    | 26,734,379           | 26,734,379                 |
|                   | chr8          | 1                    | 26,296,151           | 26,296,151                 |
|                   | chr9          | 2                    | 25,259,620           | 25,260,120                 |
|                   | chr10         | 1                    | 24,443,289           | 24,443,289                 |
| <i>A.coerulea</i> | chr11         | 2                    | 24,105,683           | 24,106,183                 |
|                   | chr12         | 1                    | 23,738,836           | 23,738,836                 |
|                   | chr13         | 2                    | 23,151,249           | 23,151,749                 |
|                   | chr14         | 4                    | 22,688,858           | 22,690,358                 |
|                   | chr15         | 2                    | 22,541,530           | 22,542,030                 |
|                   | chr16         | 1                    | 22,395,985           | 22,395,985                 |
|                   | chr17         | 1                    | 20,565,505           | 20,565,505                 |
|                   | chr18         | 1                    | 20,011,490           | 20,011,490                 |
|                   | chr19         | 1                    | 19,548,997           | 19,548,997                 |
|                   | chr20         | 3                    | 19,537,659           | 19,538,659                 |
|                   | chr21         | 2                    | 19,094,960           | 19,095,460                 |
|                   | chr22         | 2                    | 15,066,050           | 15,066,550                 |

399

400 **Supplementary Table 8. Statistics of TEs in *T. rubra* and *A.coerulea* genomes.**

401

402

| Species           | Type     | Denovo+Repbase Length(bp) | Rate (%) | TE proteins Length(bp) | Rate (%) | Combined TEs Length(bp) | Rate (%) |
|-------------------|----------|---------------------------|----------|------------------------|----------|-------------------------|----------|
| <i>T. rubra</i>   | DNA      | 30,634,570                | 11.48    | 11,144,987             | 4.18     | 34,270,163              | 12.84    |
|                   | LINE     | 25,796,510                | 9.67     | 11,973,960             | 4.49     | 29,915,257              | 11.21    |
|                   | SINE     | 4,869,953                 | 1.82     | 0                      | 0.00     | 4,869,953               | 1.82     |
|                   | LTR      | 16,260,095                | 6.09     | 2,939,498              | 1.10     | 17,550,578              | 6.58     |
|                   | Other    | 0                         | 0.00     | 0                      | 0.00     | 0                       | 0.00     |
|                   | Unknown  | 50,261,822                | 18.83    | 0                      | 0.00     | 50,261,822              | 18.83    |
|                   | Total    | 120,603,297               | 45.19    | 25,944,876             | 9.72     | 126,581,914             | 47.43    |
| <i>A.coerulea</i> | DNA      | 45,886,648                | 7.97     | 707,009                | 0.12     | 45,727,839              | 7.94     |
|                   | LINE     | 96,396,367                | 16.75    | 20,206,690             | 3.51     | 102,296,994             | 17.77    |
|                   | SINE     | 6,859,988                 | 1.20     | 0                      | 0.00     | 6,853,467               | 1.19     |
|                   | LTR      | 232,566,099               | 40.41    | 9,031,961              | 1.57     | 230,701,339             | 40.08    |
|                   | Other    | 0                         | 0.00     | 0                      | 0.00     | 0                       | 0.00     |
|                   | Unknown  | 90,804,249                | 15.77    | 0                      | 0.00     | 90,778,823              | 15.77    |
|                   | Total TE | 408,176,930               | 70.92    | 29,940,888             | 5.20     | 410,702,814             | 71.35    |

403 **Supplementary Table 9. Statistics of the gene prediction in *T. rubra* and**  
 404 ***A.coerulea*.**

| Species           | Gene set | Software   | Species   | Number                        |        |
|-------------------|----------|------------|-----------|-------------------------------|--------|
| <i>T. rubra</i>   | De novo  | Augustus   | -         | 16,812                        |        |
|                   |          | GlimmerHMM | -         | 27,384                        |        |
|                   |          | SNAP       | -         | 22,730                        |        |
|                   |          | Geneid     | -         | 5,765                         |        |
|                   |          | Genscan    | -         | 12,883                        |        |
|                   | Homolog  |            |           | <i>Aurelia aurita</i>         | 20,506 |
|                   |          |            |           | <i>Clytia hemisphaerica</i>   | 25,304 |
|                   |          |            | Blast and | <i>Hydra vulgaris</i>         | 17,557 |
|                   |          |            | Genewise  | <i>Morbakka virulenta</i>     | 15,451 |
|                   |          |            |           | <i>Pocillopora damicornis</i> | 18,625 |
|                   |          |            |           | <i>Rhopilema esculentum</i>   | 21,438 |
|                   |          |            |           |                               |        |
|                   | RNAseq   |            | PASA      | -                             | 48,492 |
|                   |          |            | Cufflinks | -                             | 46,749 |
| Intergration      |          | EVM        | -         | 18,746                        |        |
| <i>A.coerulea</i> | De novo  | Augustus   | -         | 51,133                        |        |
|                   |          | Genscan    | -         | 49,597                        |        |
|                   |          | GlimmHMM   | -         | 79,009                        |        |
|                   | Homolog  |            |           | <i>Aurelia aurita</i>         | 76,379 |
|                   |          |            |           | <i>Aurelia sp1</i>            | 86,080 |
|                   |          |            |           | <i>Cassiopea xamachana</i>    | 36,171 |
|                   |          |            | Exonerate | <i>Chrysaora</i>              | 37,770 |
|                   |          |            |           | <i>quinquecirrha</i>          |        |
|                   |          |            |           | <i>Hydra vulgaris</i>         | 17,611 |
|                   |          |            |           | <i>Rhopilema esculentum</i>   | 32,353 |
| RNAseq            | PASA     | -          | 6,658     |                               |        |
| Intergration      | MAKER    | -          | 32,035    |                               |        |

405 **Supplementary Table 10. Statistics of functional annotation of protein-coding**  
 406 **genes in *T. rubra* and *A.coerulea*.**

| Species           | Annotation database | Number | Percent(%) |
|-------------------|---------------------|--------|------------|
| <i>T. rubra</i>   | Swissprot           | 12,770 | 68.12      |
|                   | Nr                  | 16,890 | 90.10      |
|                   | KEGG                | 13,385 | 71.40      |
|                   | InterPro            | 16,674 | 88.95      |
|                   | GO                  | 7,805  | 41.64      |
|                   | Pfam                | 12,322 | 65.73      |
|                   | Annotated           | 16,898 | 90.14      |
|                   | Unannotated         | 1,848  | 9.86       |
| <i>A.coerulea</i> | InterPro            | 24,625 | 76.87      |
|                   | GO                  | 13,592 | 42.43      |
|                   | KEGG_ALL            | 30,628 | 95.61      |
|                   | KEGG_KO             | 8,724  | 27.23      |
|                   | Swissprot           | 21,001 | 65.56      |
|                   | TrEMBL              | 30,979 | 96.70      |
|                   | NR                  | 30,891 | 96.43      |
|                   | Annotated           | 31,116 | 97.13      |
| Unannotated       | 919                 | 2.87   |            |

407



408 **Supplementary Table 11. Statistics of the non-coding RNA of *T. rubra* and**  
 409 ***A.coerulea* genomes.**

| Species           | Type     | Copy  | Average length(bp) | Total length(bp) | % of genome |
|-------------------|----------|-------|--------------------|------------------|-------------|
| <i>T. rubra</i>   | miRNA    | 125   | 116.00             | 14,531           | 0.0050      |
|                   | tRNA     | 8,425 | 75.00              | 629,943          | 0.2406      |
|                   | rRNA     | 496   | 98.20              | 48,709           | 0.0180      |
|                   | 18S      | 55    | 189.31             | 10,412           | 0.0039      |
|                   | 28S      | 8     | 126.50             | 1,012            | 0.0004      |
|                   | 5.8S     | 0     | 0.00               | 0                | 0.0000      |
|                   | 5S       | 433   | 86.11              | 37,285           | 0.0140      |
|                   | snRNA    | 747   | 128.43             | 95,935           | 0.0359      |
|                   | CD-box   | 43    | 131.40             | 5,650            | 0.0021      |
|                   | HACA-box | 16    | 185.12             | 2,962            | 0.0011      |
|                   | splicing | 676   | 126.34             | 85,406           | 0.0320      |
| <i>A.coerulea</i> | miRNA    | 65    | 38.43              | 2,498            | 0.0004      |
|                   | tRNA     | 2,341 | 75.19              | 176,034          | 0.0306      |
|                   | rRNA     | 630   | 1,741.31           | 1,097,027        | 0.1906      |
|                   | 18S      | 187   | 1,793.33           | 335,353          | 0.0583      |
|                   | 28S      | 183   | 3,999.16           | 731,847          | 0.1271      |
|                   | 5S       | 260   | 114.71             | 29,827           | 0.0052      |
|                   | snRNA    | 39    | 149.43             | 5,828            | 0.0010      |
|                   | CD-box   | 2     | 218.00             | 436              | 0.0001      |
|                   | HACA-box | 0     | 0.00               | 0                | 0.0000      |
|                   | splicing | 37    | 145.72             | 5,392            | 0.0009      |
| scaRNA            | 0        | 0.00  | 0                  | 0.0000           |             |

410

411 **Supplementary Table 12. BUSCO evaluation of annotated results.**

412

| n=954                           | Percentages(%)  |                    |
|---------------------------------|-----------------|--------------------|
|                                 | <i>T. rubra</i> | <i>A. coerulea</i> |
| Complete BUSCOs                 | 93.3            | 88.3               |
| Complete and single-copy BUSCOs | 88.4            | 87.9               |
| Complete and duplicated BUSCOs  | 4.9             | 0.5                |
| Fragmented BUSCOs               | 1.6             | 4.7                |
| Missing BUSCOs                  | 5.1             | 6.9                |

413

414 **Supplementary Table 13. Comparison of genome assemblies of *Turritopsis* and *Aurelia* with published genomic statistics.**  
 415

| Species                | <i>T. rubra</i>   | <i>T. rubra</i>             | <i>T.dohrni</i><br><i>i</i> | <i>T. dohrnii</i>     | <i>A. coerulea</i> | <i>Aurelia</i> sp1 | <i>A. aurita</i><br>(Atlantic) | <i>A. aurita</i><br>(Pacific) |
|------------------------|-------------------|-----------------------------|-----------------------------|-----------------------|--------------------|--------------------|--------------------------------|-------------------------------|
| Assembly size (bp)     | <b>266.86</b>     | 210.00                      | 390.00                      | 435.92                | <b>566.06</b>      | 713.00             | 377.00                         | 429.00                        |
| Contig num             | <b>762</b>        | 53,262                      | 68,044                      | 891                   | <b>42</b>          | 67,005             | 170,088                        | 213,756                       |
| contig N50(bp)         | <b>1,187,606</b>  | 3,457                       | 7,666                       | 747,194               | <b>22,395,985</b>  | 20k                | 2,627                          | 2,665                         |
| Scaffold num           | <b>329</b>        | 9,508                       | 74,829                      | —                     | <b>22</b>          | 16,793             | 2,710                          | 7,744                         |
| scaffold N50(bp)       | <b>16,943,197</b> | 71,856                      | 10,419                      | —                     | <b>25,260,120</b>  | 124K               | 1.04M                          | 0.2M                          |
| GC Content(%)          | <b>34.26</b>      | 34.00                       | 34.50                       | 34.70                 | <b>37.34</b>       | 32.60              | 37.10                          | 37.60                         |
| TE rate(%)             | <b>47.43</b>      | 39.45                       | 50.78                       | 60.35                 | <b>73.14</b>       | 49.50              | 44.67                          | 44.03                         |
| Complete BUSCOs<br>(%) | <b>92.40</b>      | 88.78                       | 78.88                       | 90.40                 | <b>86.40</b>       | —                  | 72.20                          | 49.00                         |
| Gene num               | <b>18,746</b>     | 9,324                       | 17,468                      | 23,314                | <b>32,035</b>      | 29,964             | 28,625                         | 30,166                        |
| Genome coverage        | <b>200×</b>       | 96×                         | 95×                         | 219.5×                | <b>120×</b>        | —                  | 90×                            | 90×                           |
| Assembly level         | <b>chromosome</b> | scaffold                    | scaffold                    | contig                | <b>chromosome</b>  | scaffold           | scaffold                       | scaffold                      |
| Reference              | <b>This study</b> | Pascual-Torner et al., 2022 |                             | Hasegawa et al., 2023 | <b>This study</b>  | Gold et al, 2019   | Khalturin et al.,2019          |                               |

416 **Supplementary Table 14. GenBank accession numbers of statocyst related PSGs**  
 417 **protein sequences of four vertebrate species.**

| Gene            | Species            | GenBank accession number |
|-----------------|--------------------|--------------------------|
| <i>CHSY1</i>    | <i>D. rerio</i>    | NP_997843                |
|                 | <i>G. gallus</i>   | XP_015147744             |
|                 | <i>M. musculus</i> | NP_001074632             |
|                 | <i>H. sapiens</i>  | AAQ88893                 |
| <i>USH2A</i>    | <i>D. rerio</i>    | XP_009291422.1           |
|                 | <i>G. gallus</i>   | XP_015139379.2           |
|                 | <i>M. musculus</i> | AAZ23164.1               |
|                 | <i>H. sapiens</i>  | KAI4084958.1             |
| <i>CDH23</i>    | <i>D. rerio</i>    | NP_999974.1              |
|                 | <i>G. gallus</i>   | XP_421595.5              |
|                 | <i>M. musculus</i> | NP_075859.2              |
|                 | <i>H. sapiens</i>  | NP_071407.4              |
| <i>DCTN1</i>    | <i>D. rerio</i>    | XP_021336434.1           |
|                 | <i>G. gallus</i>   | XP_040555015.1           |
|                 | <i>M. musculus</i> | NP_001185795.1           |
|                 | <i>H. sapiens</i>  | NP_004073.2              |
| <i>CEP83</i>    | <i>D. rerio</i>    | NP_001340860.1           |
|                 | <i>G. gallus</i>   | XP_015139570.1           |
|                 | <i>M. musculus</i> | NP_084128.2              |
|                 | <i>H. sapiens</i>  | NP_057206.2              |
| <i>KIAA2026</i> | <i>D. rerio</i>    | XP_005173914.1           |
|                 | <i>G. gallus</i>   | XP_004949130.2           |
|                 | <i>M. musculus</i> | NP_766424.2              |
|                 | <i>H. sapiens</i>  | NP_001017969.2           |

418

419 **Supplementary Table 15. Number of DEGs of the sensory organs compared with**  
 420 **control samples in each species (Q<0.01).**  
 421

| Species                 | Up    | Down  | Total |
|-------------------------|-------|-------|-------|
| <i>T. rubra</i>         | 1,303 | 3,335 | 4,638 |
| <i>C. quinquecirrha</i> | 4,796 | 5,140 | 9,936 |
| <i>R. esculentum</i>    | 1,048 | 413   | 1,461 |
| <i>A. coerulea</i>      | 3,698 | 4,032 | 7,730 |

422

423 **Supplementary Table 16. The sequences of RNAi used in the study.**

424

| SiRNA  | Number | Sequence (5'-3')    |
|--------|--------|---------------------|
|        | 1      | CTATCGATCTCACGTTGAA |
| Si-OM  | 2      | GGCTACAACAGGCAAACAA |
|        | 3      | GGCAACGACTTCAAAGGAA |
|        | 1      | CCTACAACGAAACAGGATA |
| Si-LRR | 2      | CCAGACTTTCGAGGAATCA |
|        | 3      | GGAAACAGTCTCTCAAACA |

425

426 **Supplementary Table 17. RT-qPCR primer sequence of select gene.**

427

| Gene name  | Sequence (5'-3')         |
|------------|--------------------------|
| <i>OM</i>  | F: TCACGGTTCGATCGCTTTGG  |
|            | R: TCCACTGCATCCAGTAGCCT  |
| <i>LRR</i> | F: CCGAGCTTCACCTACAACGA  |
|            | R: CGGTGCAAGTTTCATGCCATC |

428

429 **Supplementary Table 18. The Sc-RNA sequencing information of *T. rubra* and *A.***  
 430 ***coerulea* medusa.**  
 431

| Species            | Platform        | Data | Number of captured cells | Number of selected cells |
|--------------------|-----------------|------|--------------------------|--------------------------|
| <i>T. rubra</i>    | 10X<br>Genomics | 120G | 28,607                   | 22,245                   |
| <i>A. coerulea</i> | BD<br>Rhapsody  | 120G | 37,671                   | 18,936                   |

432



433 **Supplementary Table 19. The Sc-RNA sequencing information of five stages of *T.***  
 434 ***rubra.***  
 435

| Stage                       | Platform        | Data | Number of captured cells | Number of selected cells |
|-----------------------------|-----------------|------|--------------------------|--------------------------|
| Planula (Pl)                | 10X<br>Genomics | 80G  | 4,416                    | 4,079                    |
| Polyp (Po)                  | BD Rhapsody     | 80G  | 8,647                    | 4,739                    |
| Medusa (Me)                 | 10X<br>Genomics | 120G | 28,607                   | 22,245                   |
| Four-leaf structure<br>(Ff) | BD Rhapsody     | 80G  | 12,184                   | 8,368                    |
| Cyst (Cy)                   | BD Rhapsody     | 80G  | 7,416                    | 5,523                    |

436

437 **Supplementary Table 20. Sequences of the primers, related to ISH experimental**  
 438 **procedures.**

| Species            | Gene name      | Gene ID       | Sequence (5'-3')            |
|--------------------|----------------|---------------|-----------------------------|
| <i>T. rubra</i>    | <i>LOXHD1</i>  | evm.model.Hic | F: GGCATTGGTCCTGCATGGTA     |
|                    |                | _asm_10.1109  | R: GCTGCTTGGTTGATAGTGGC     |
|                    | <i>USH2A</i>   | evm.model.Hic | F: GTCAACGTGTCCTGGTCGAT     |
|                    |                | _asm_9.1159   | R: TCCAGCCCAACATGAAACGA     |
| <i>A. coerulea</i> | <i>LOXHD1</i>  | Aco27060      | F: TTAGCACAGGTGGACTGGT      |
|                    |                |               | R: ACCATCACACGACAAGGTGA     |
|                    | <i>USH2A</i>   | Aco20175      | F: ACAGTCGTTGGCTGCTCTAC     |
|                    |                |               | R: AGGTGAGCTTTCTGGTGTCG     |
|                    | <i>OMs</i>     | Aco05836      | F: CGATGCCTGACCTAAGAGGC     |
|                    |                |               | R: AAGACGCCTTGTGGCAGATA     |
|                    | <i>CFAP141</i> | Aco15911      | F: TAAGGAACTTGAAGAGCAGTCTGT |
|                    |                |               | R: CAGTTGAGCTTGCCGAACC      |

439
